# Supplementary material for: Genome co-amplification upregulates a mitotic gene network activity that predicts outcome and response to mitotic protein inhibitors in breast cancer
Source: Springer Nature journal article supplement (doi:10.1186/s13058-016-0728-y), 2016-07-01

ASPM

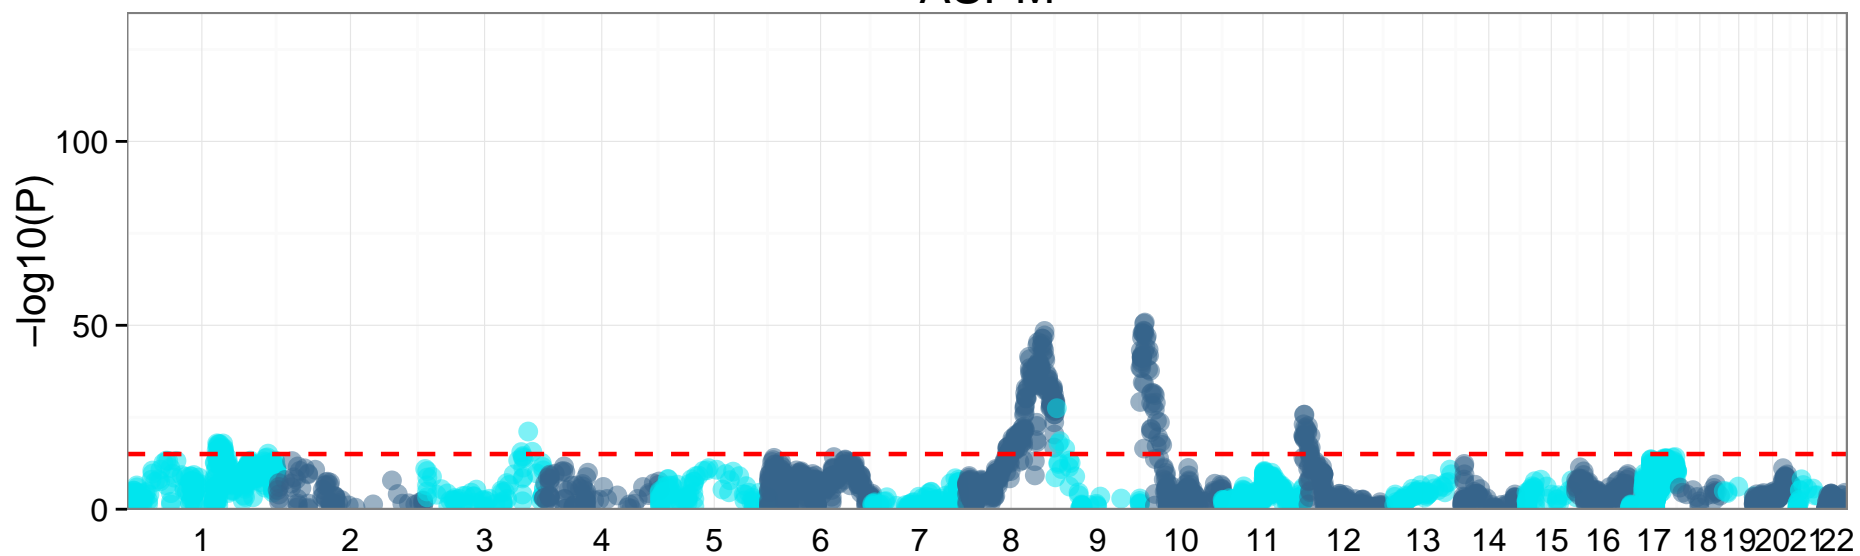

AURKA

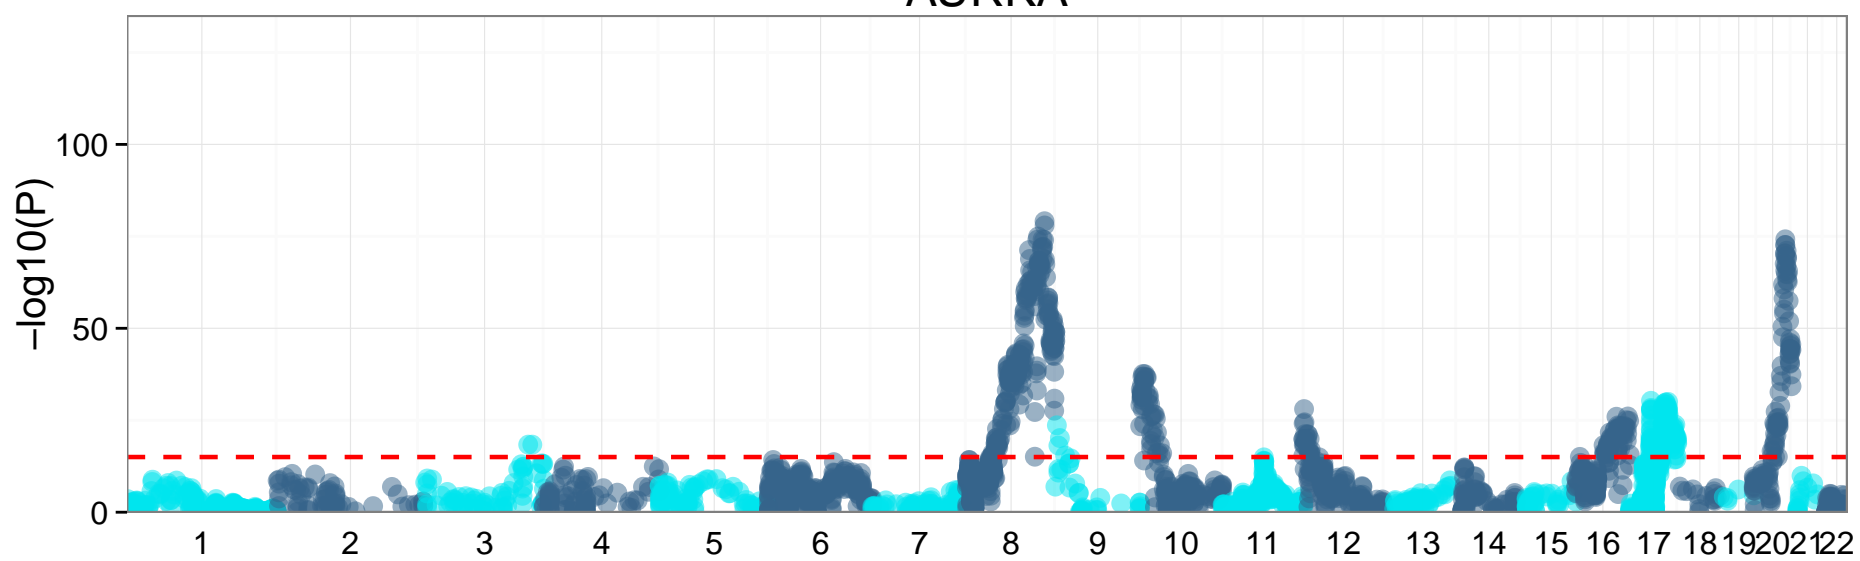

AURKB

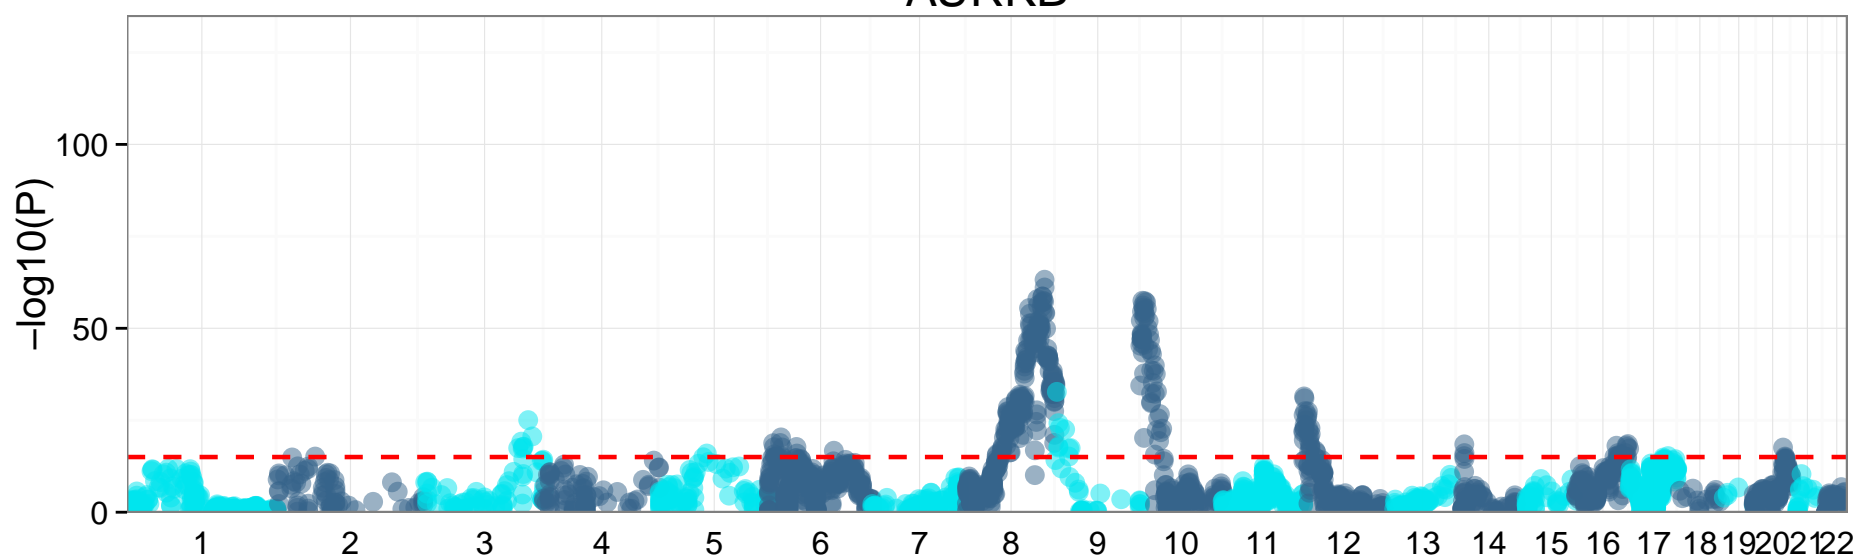

**BUB1**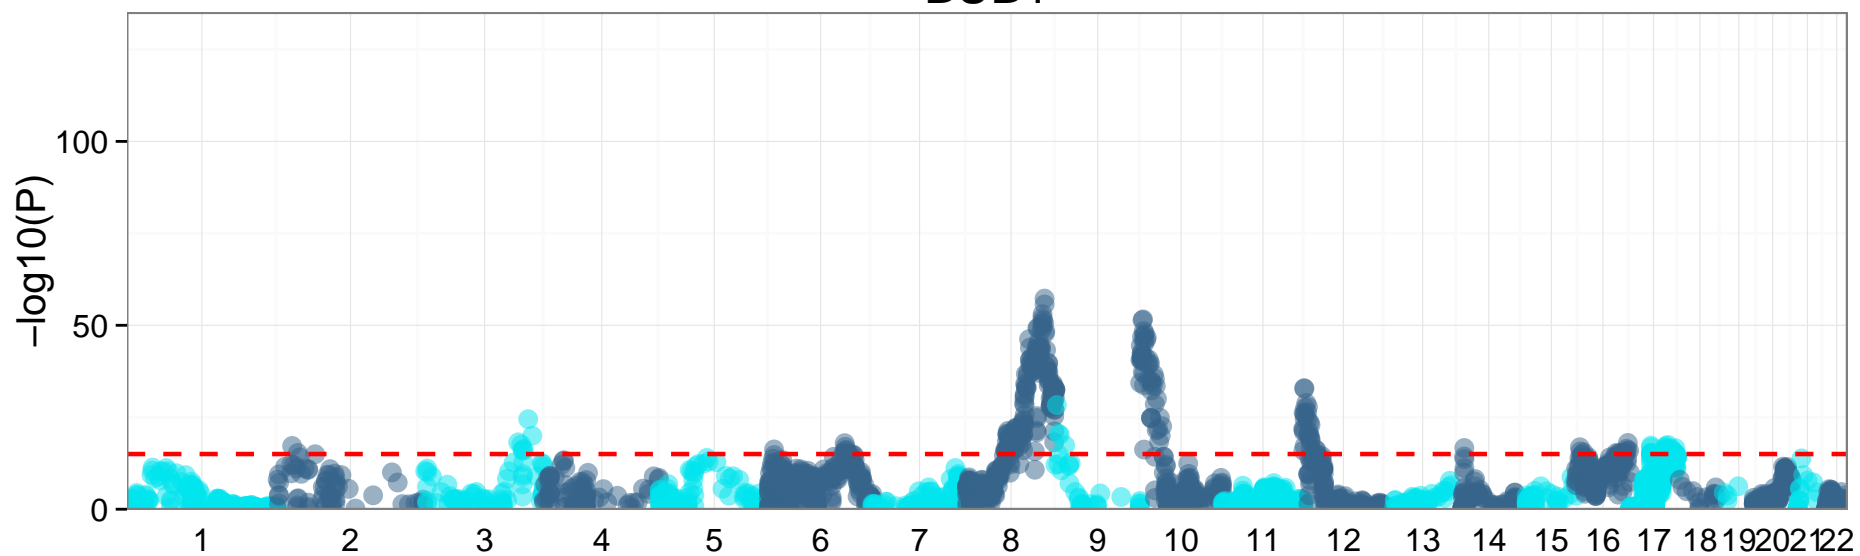**BUB1B**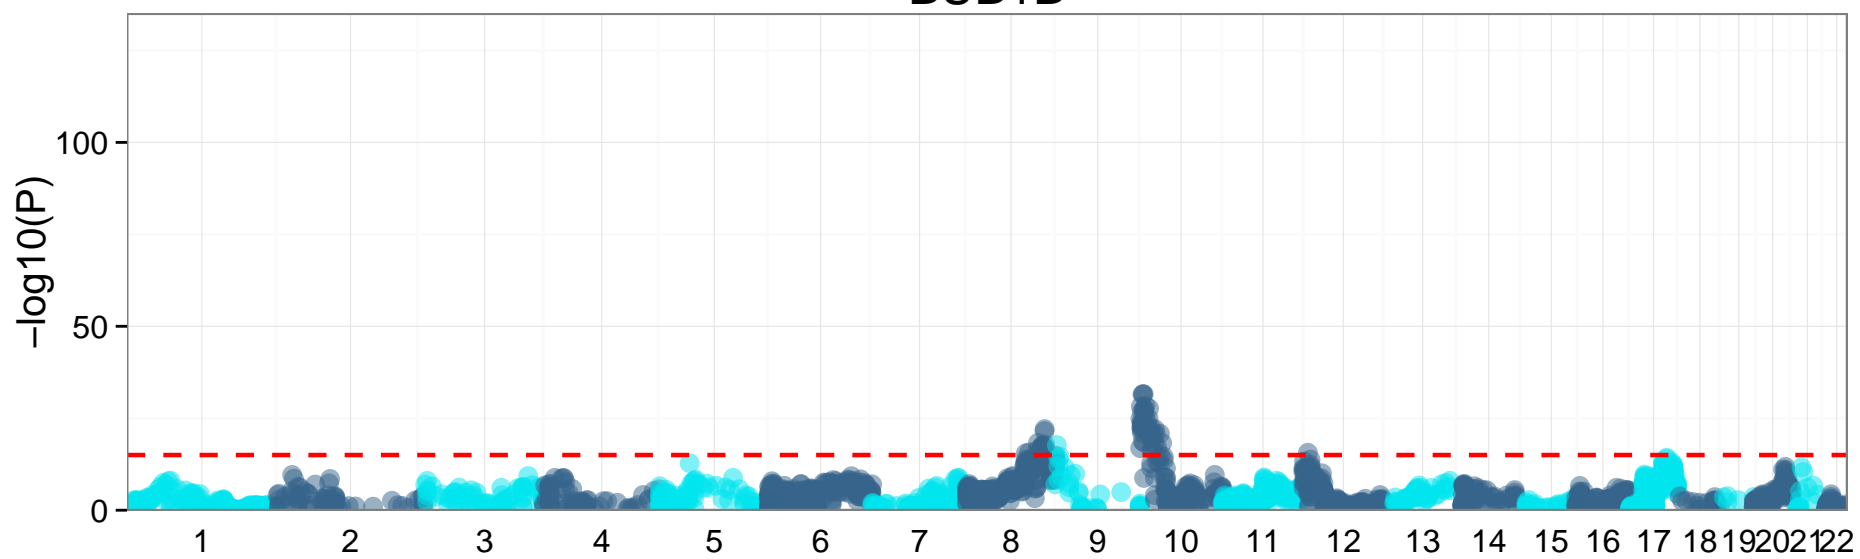**CCNA2**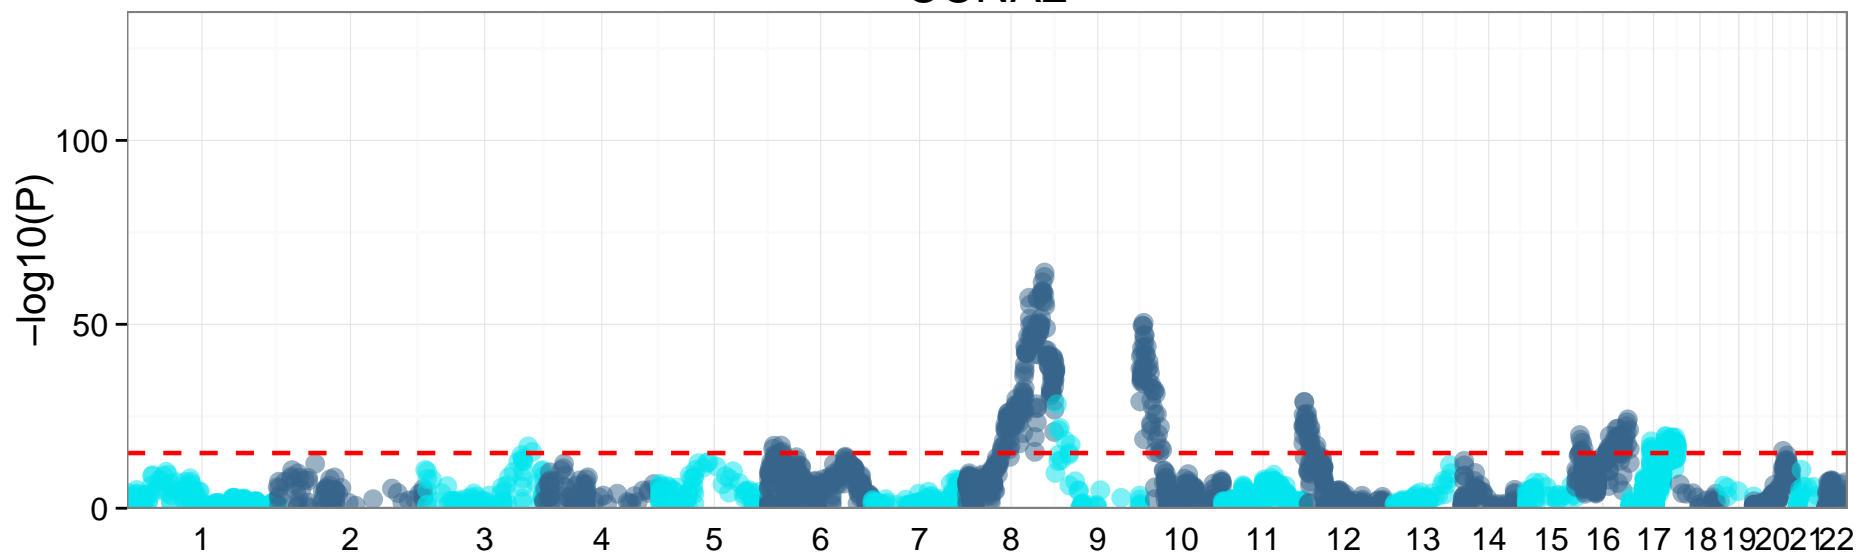

CCNB1

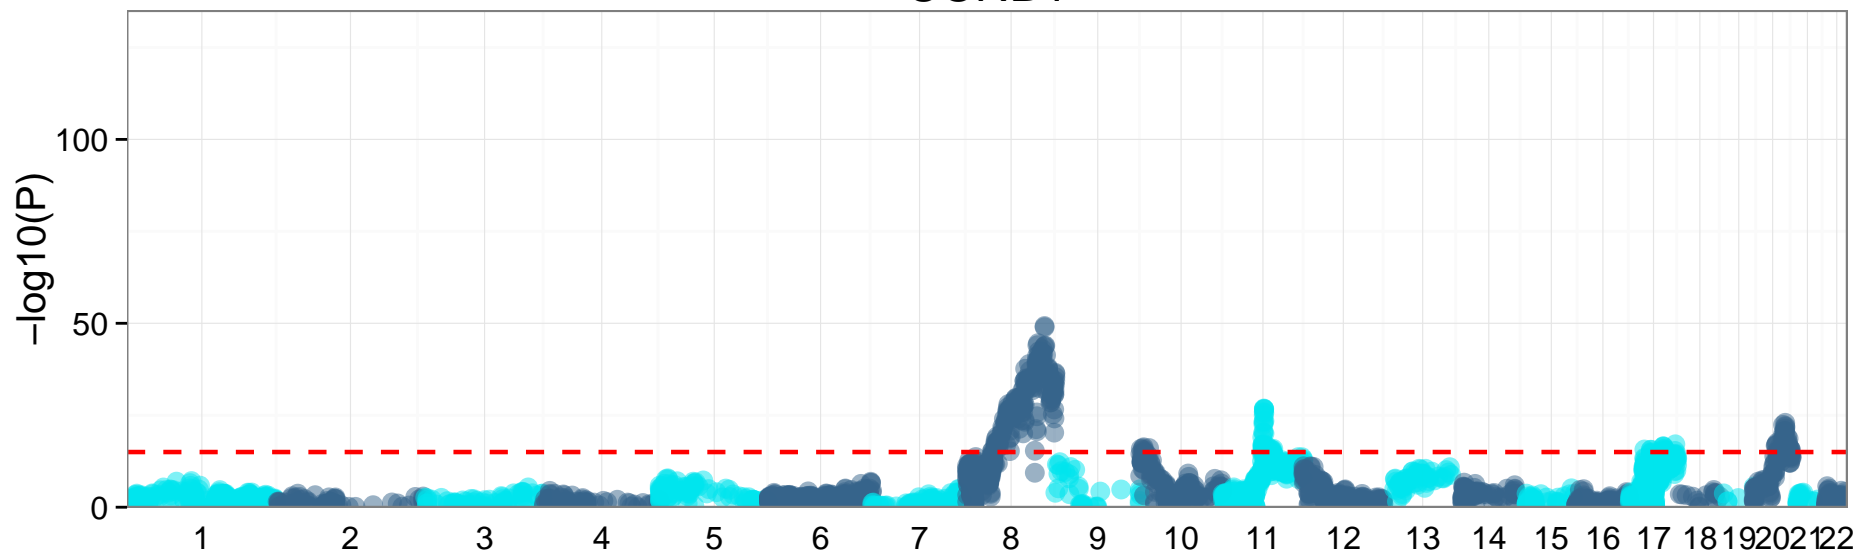

CCNB2

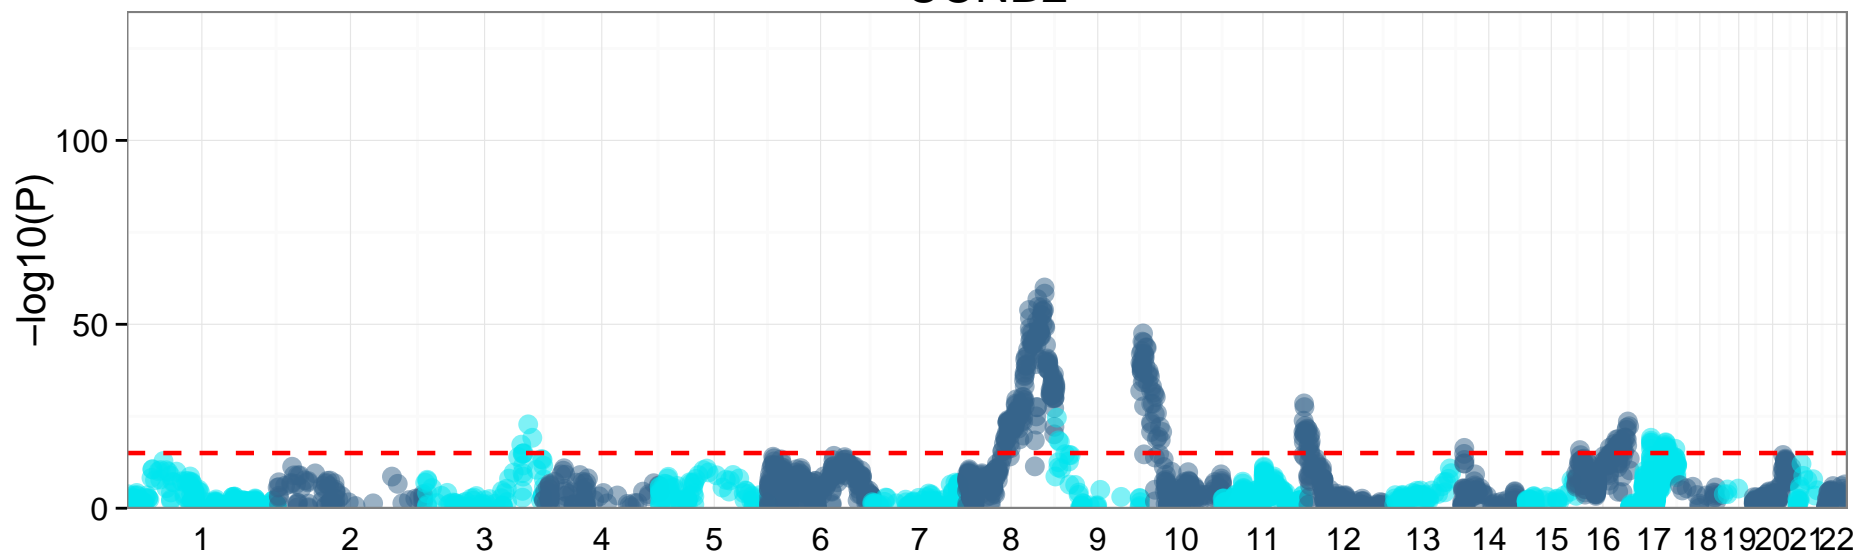

CDC20

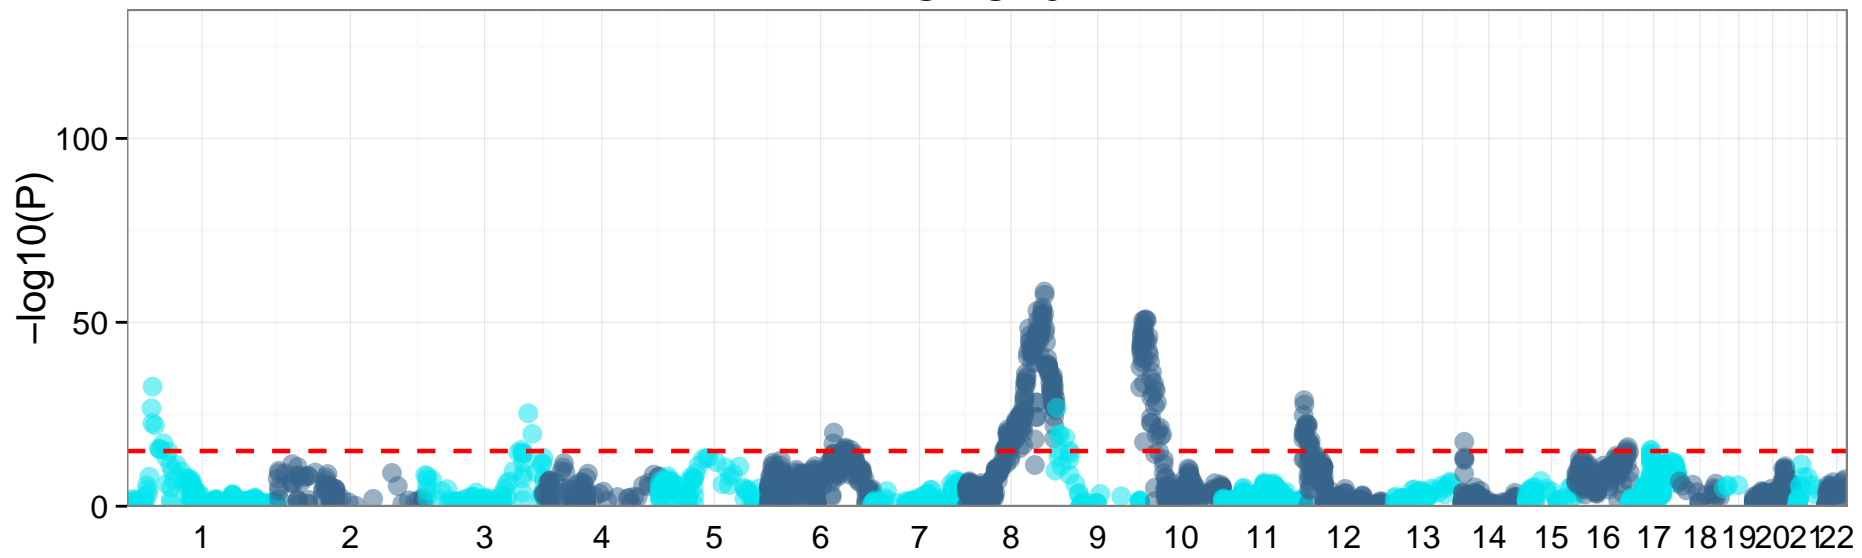

CDCA3

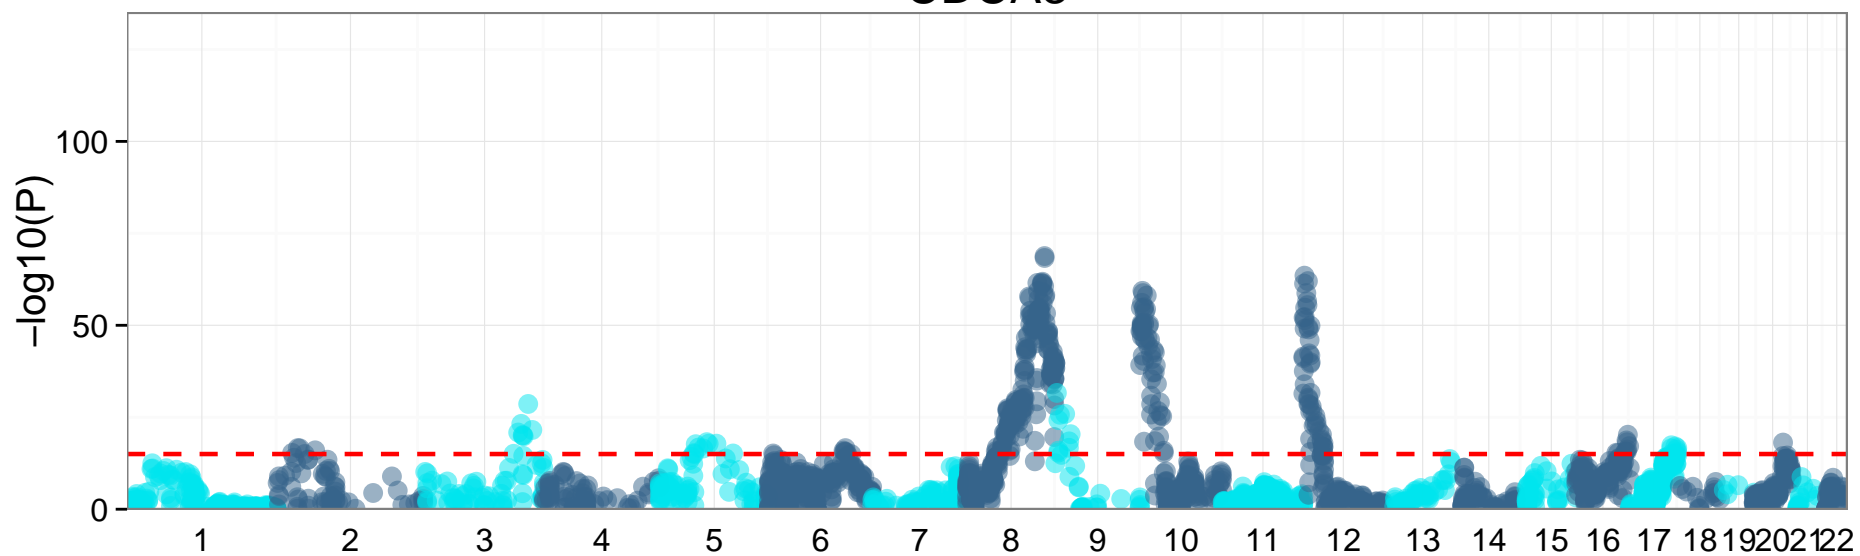

CDCA8

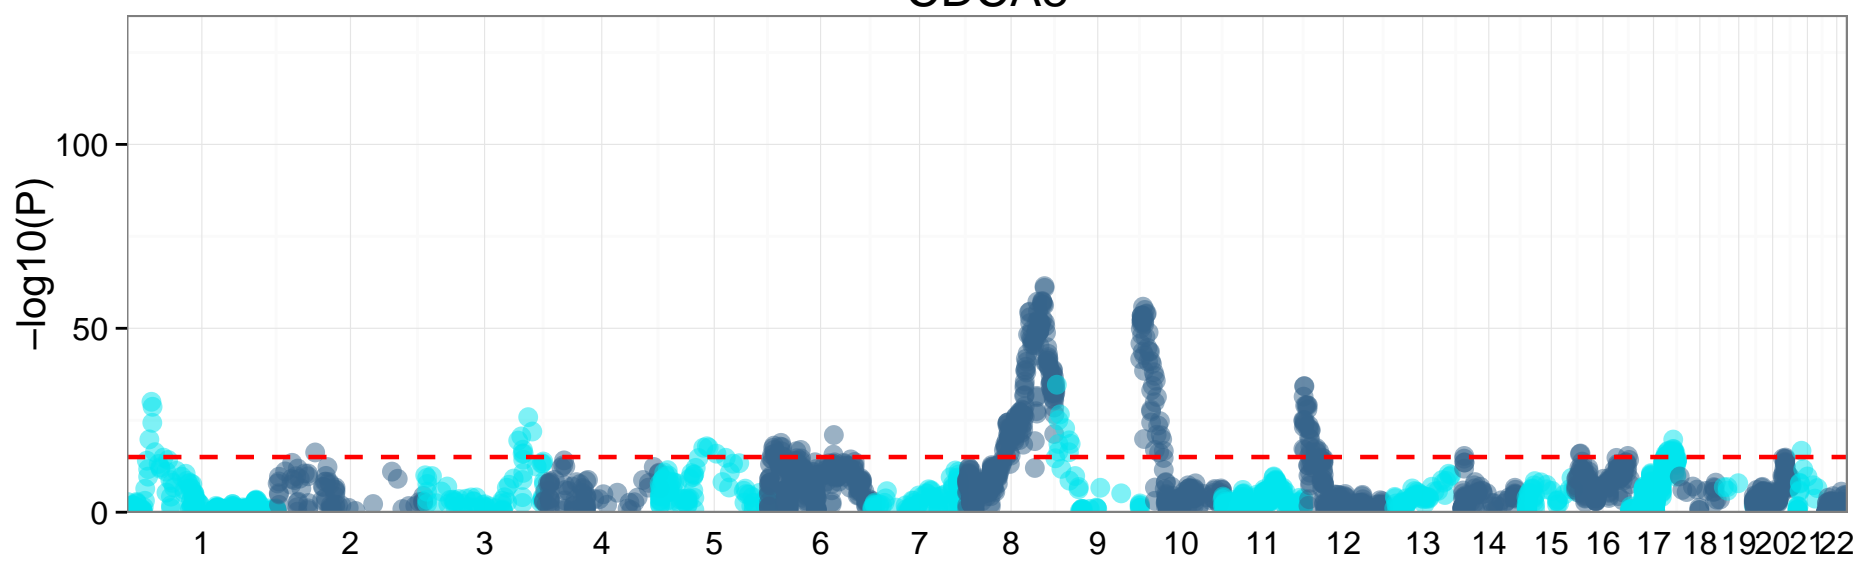

CENPA

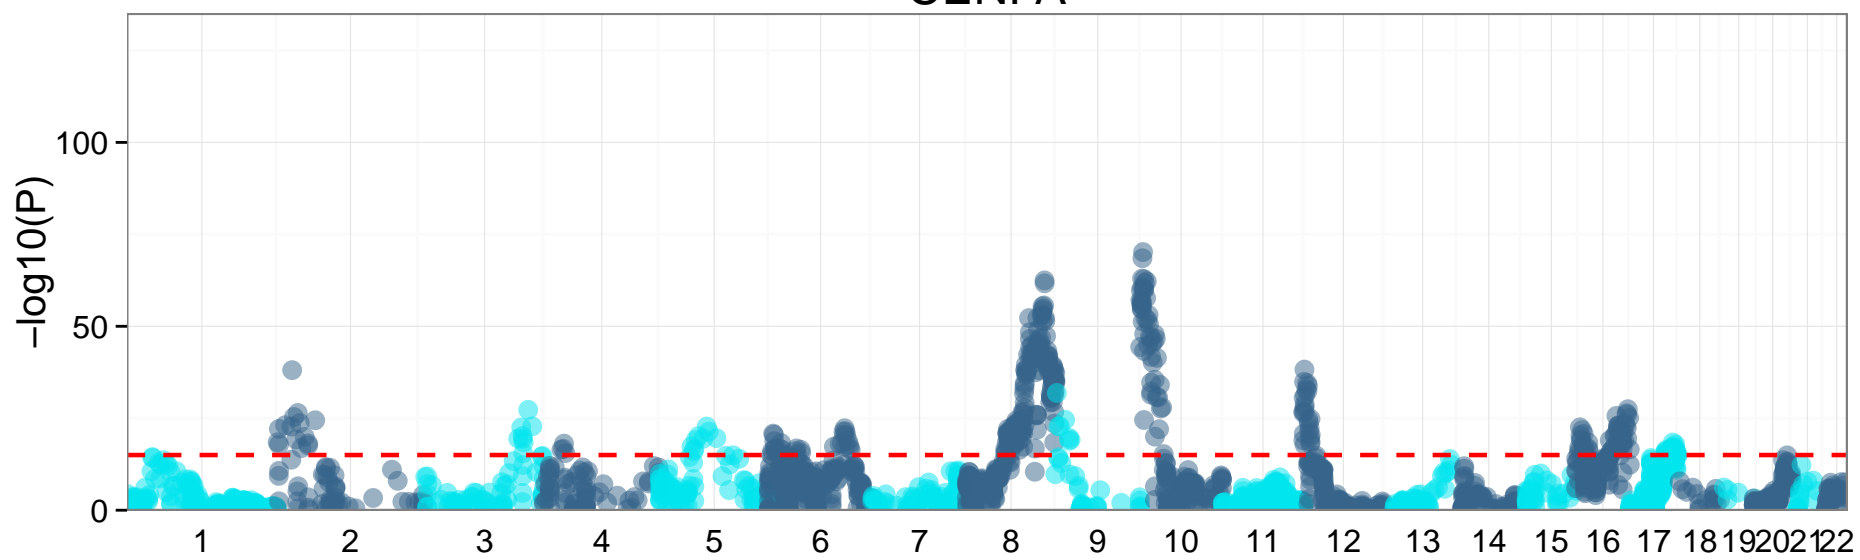



CENPE

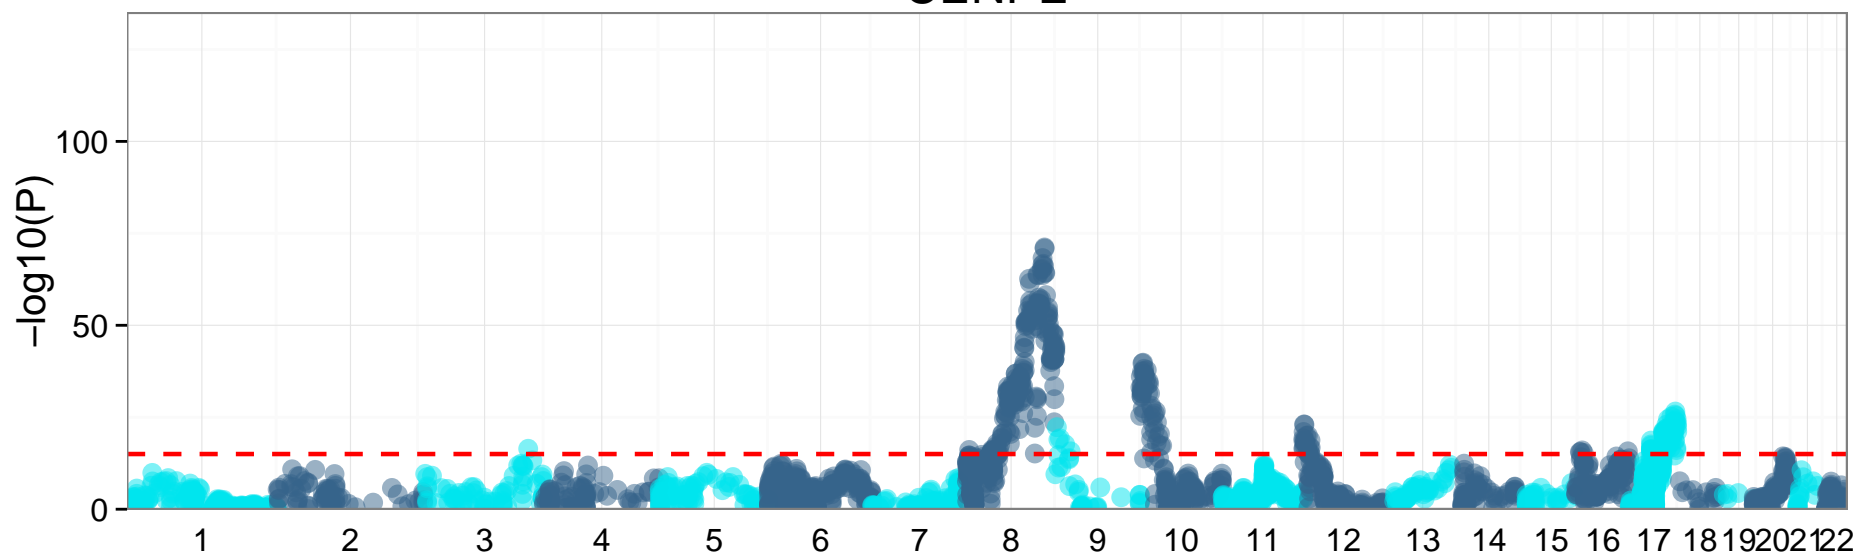

CENPN

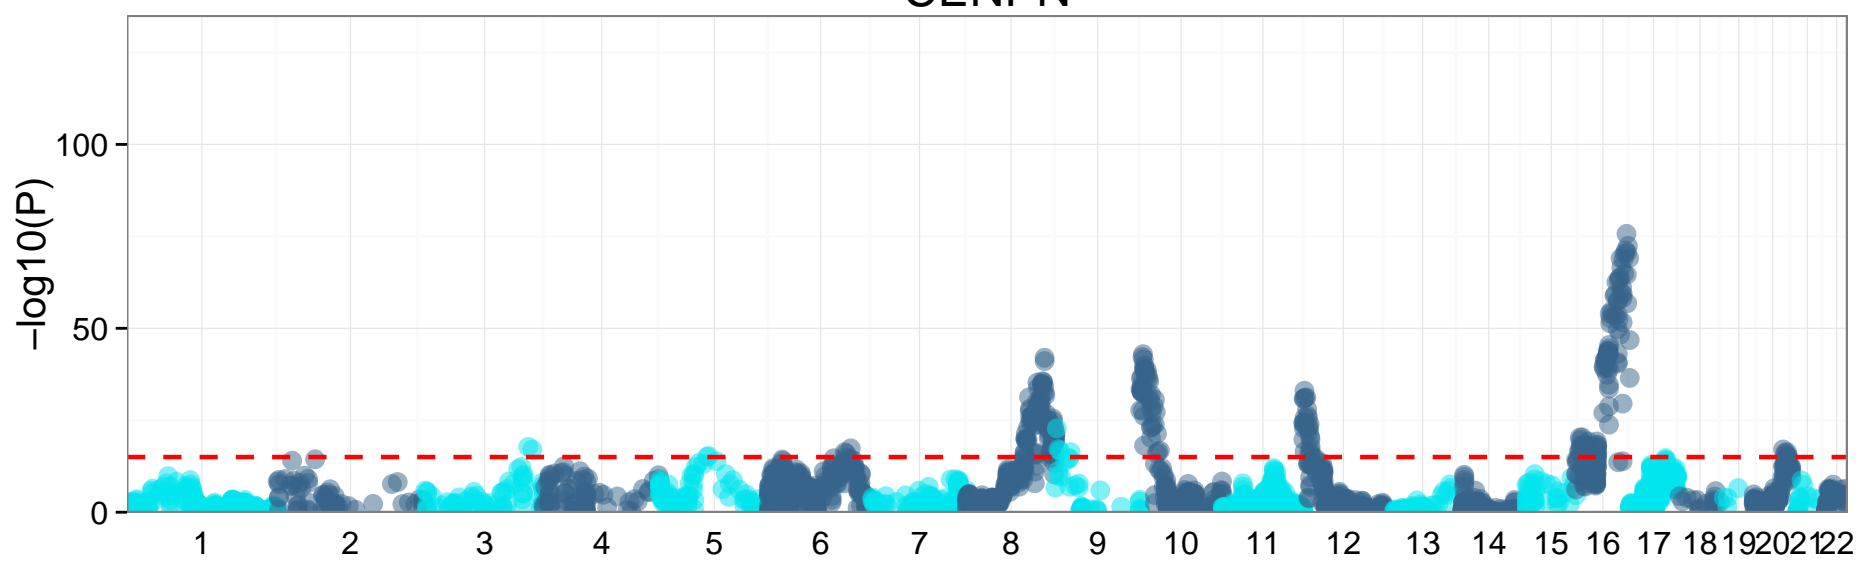

CEP55

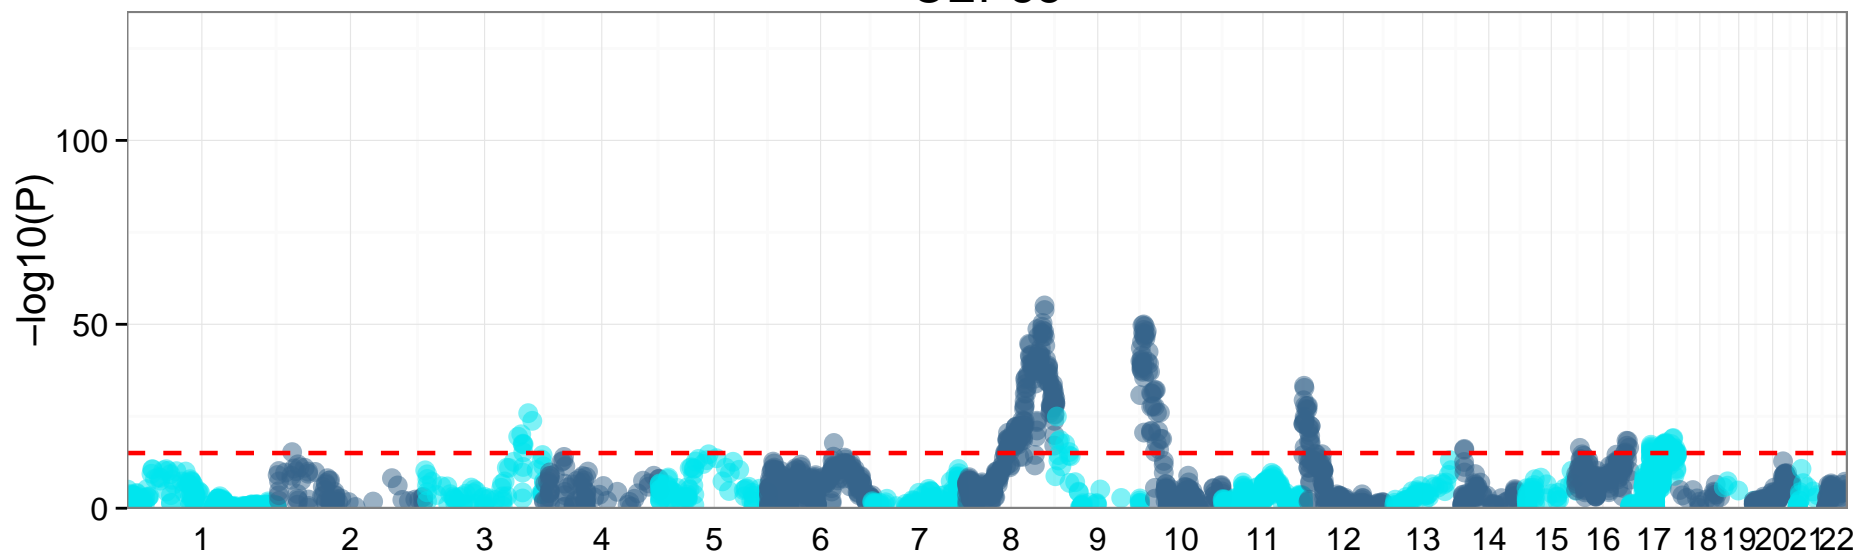

### CHEK1

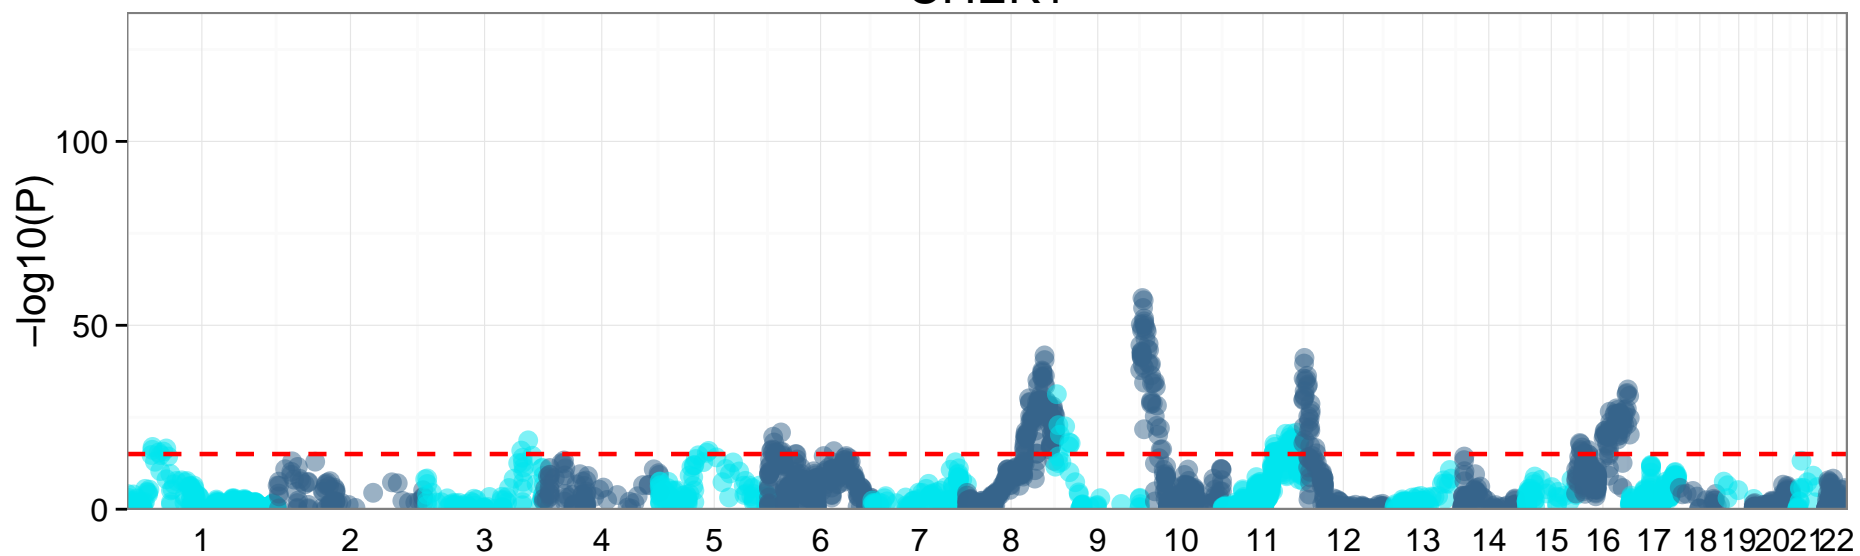

### DDX39

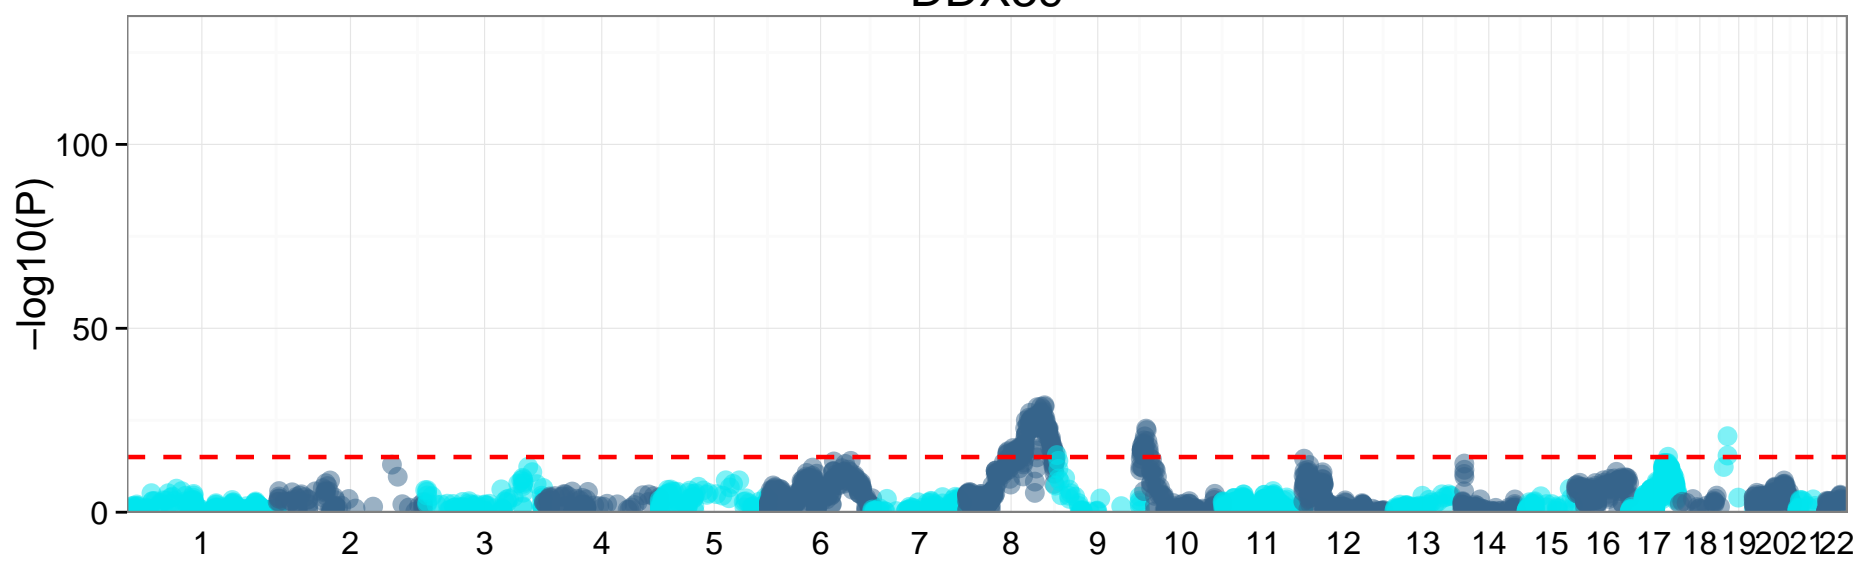

### DEPDC1

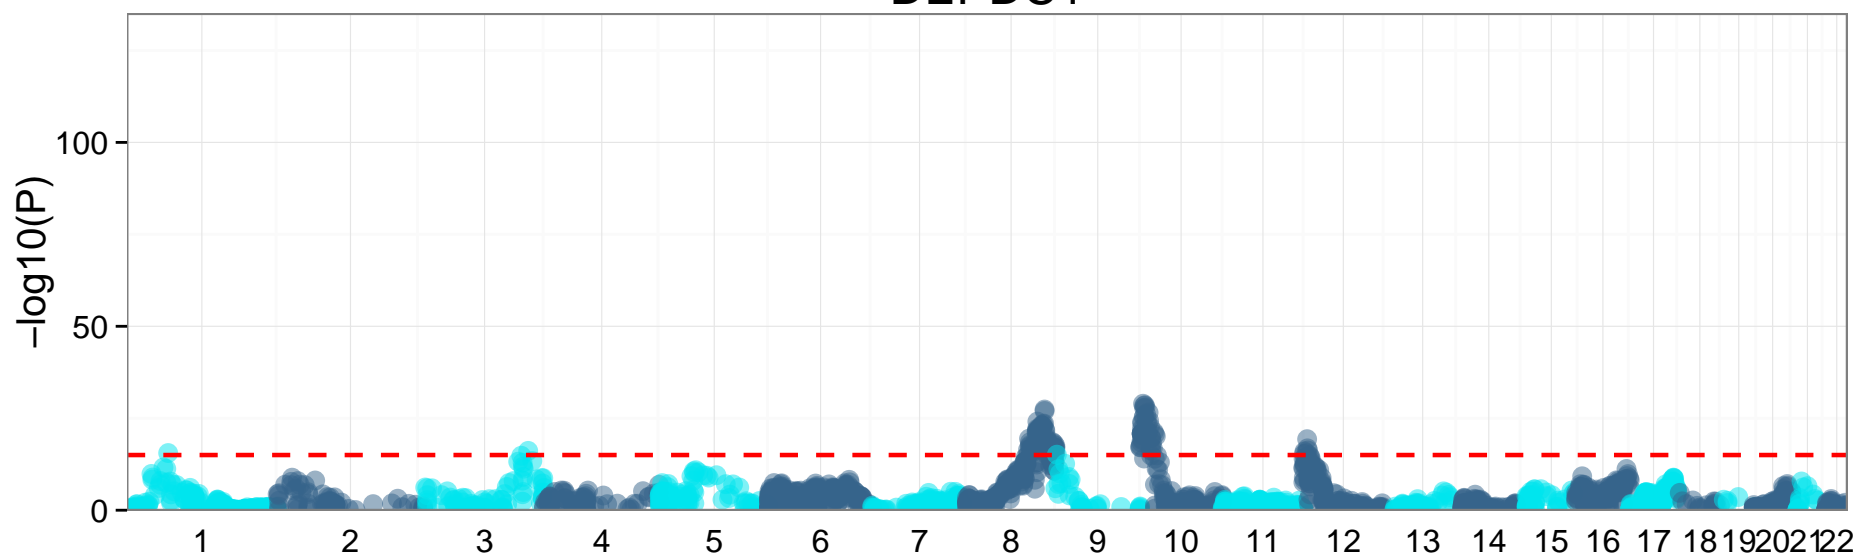

DLG7

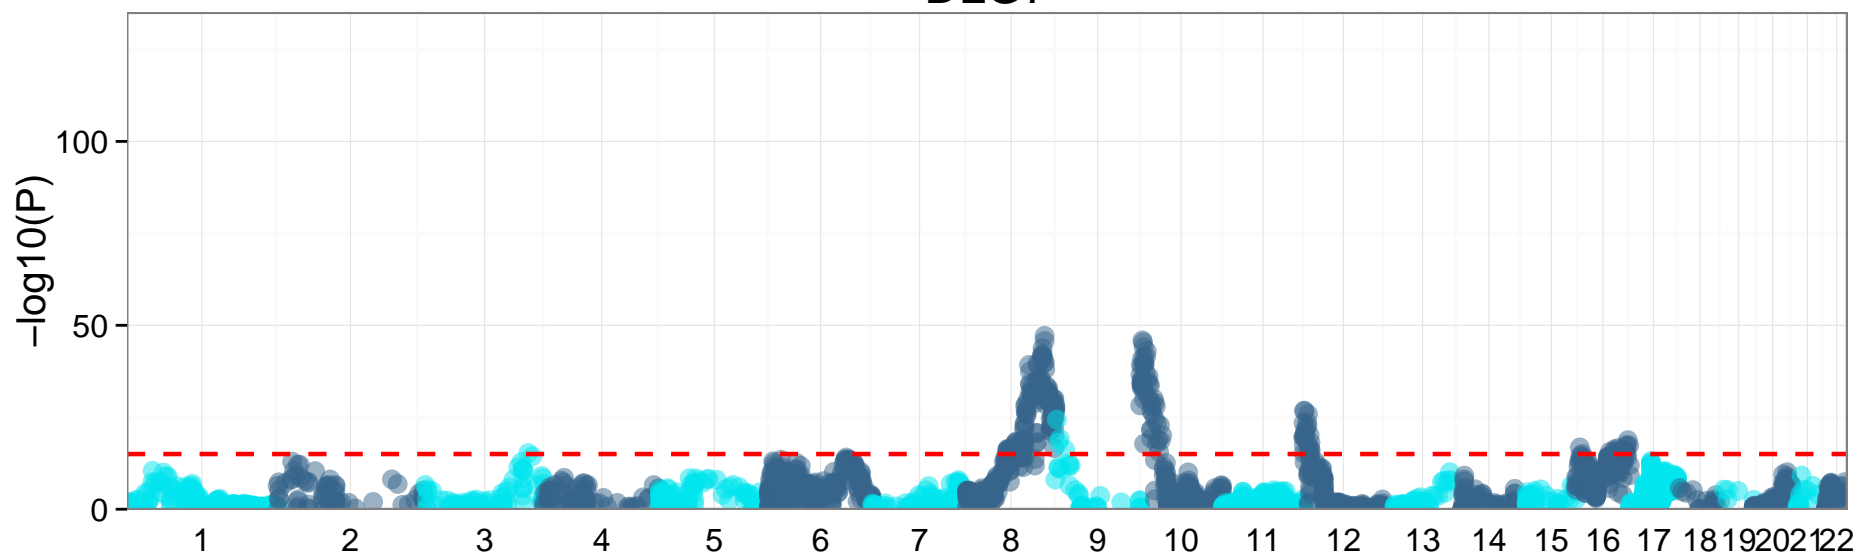

EXO1

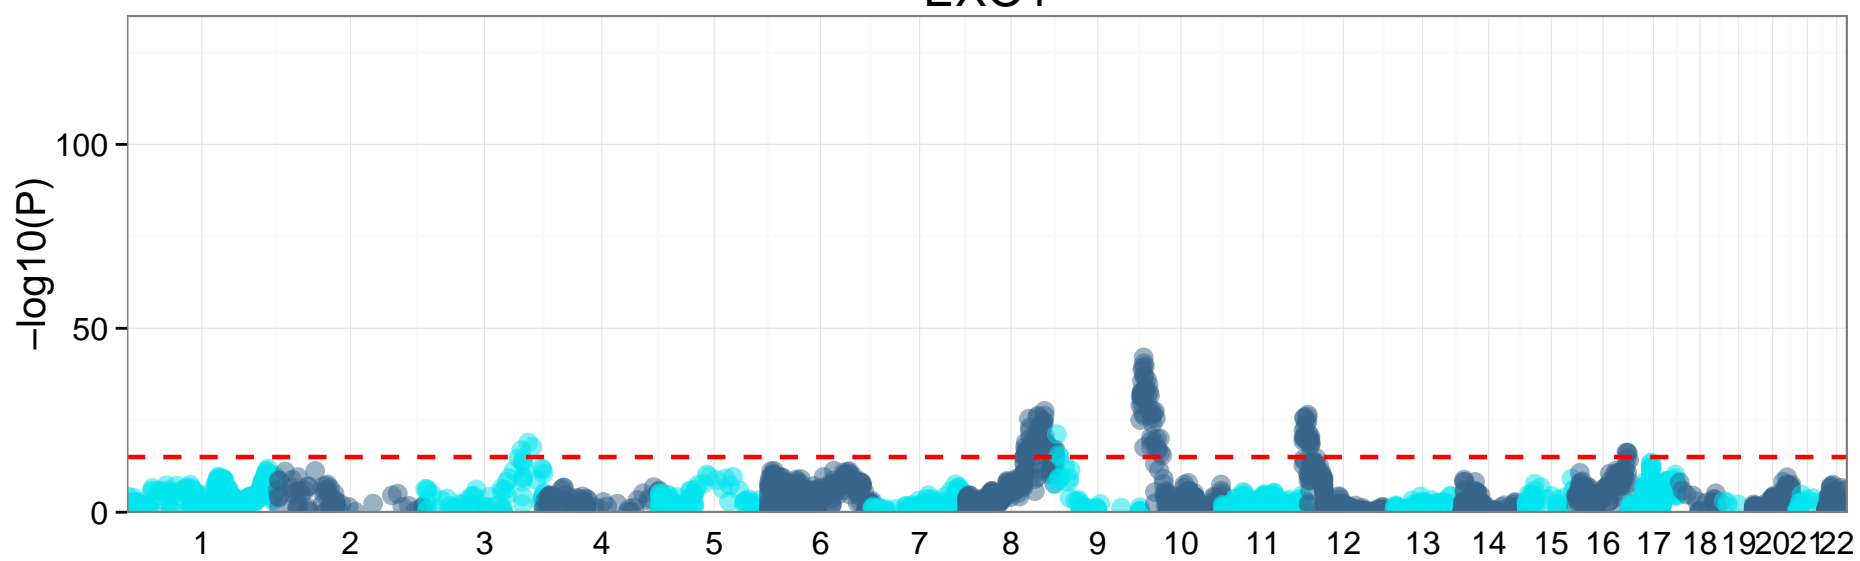

EXOSC9

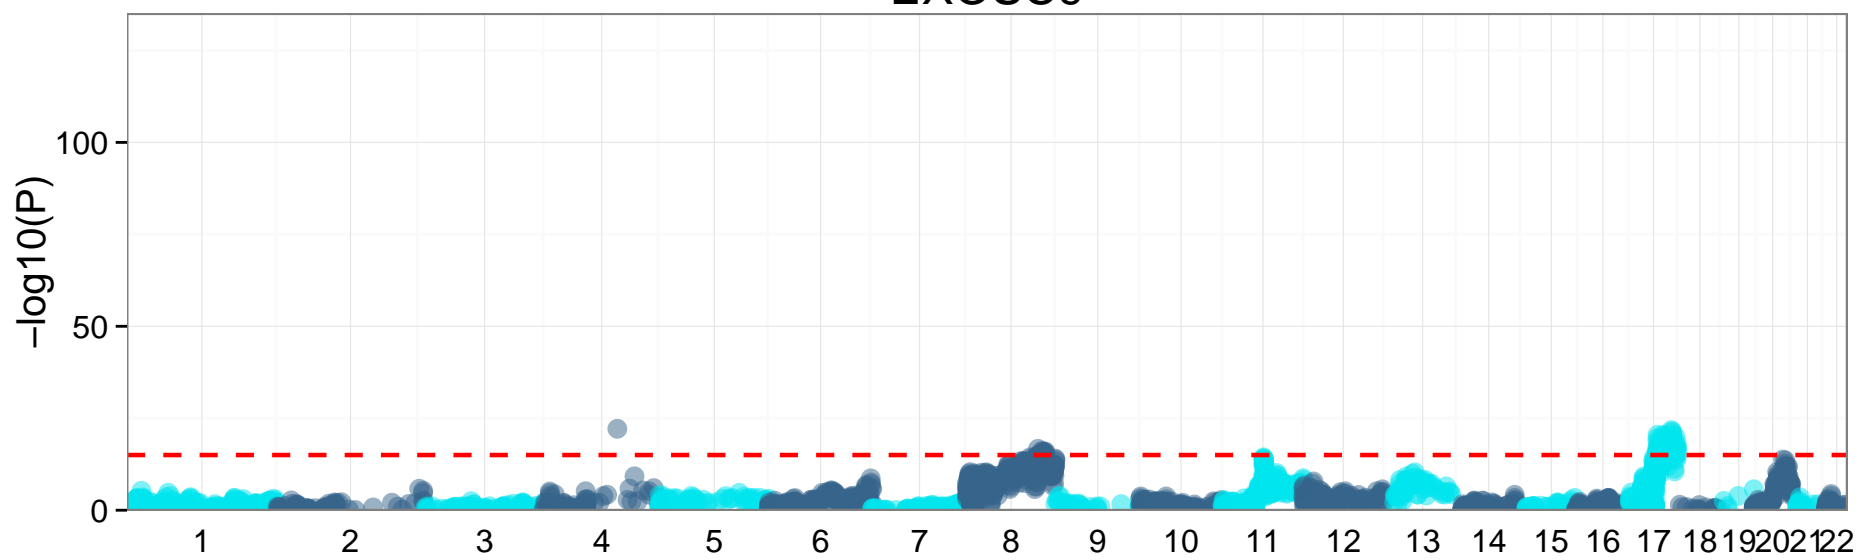

FAM64A

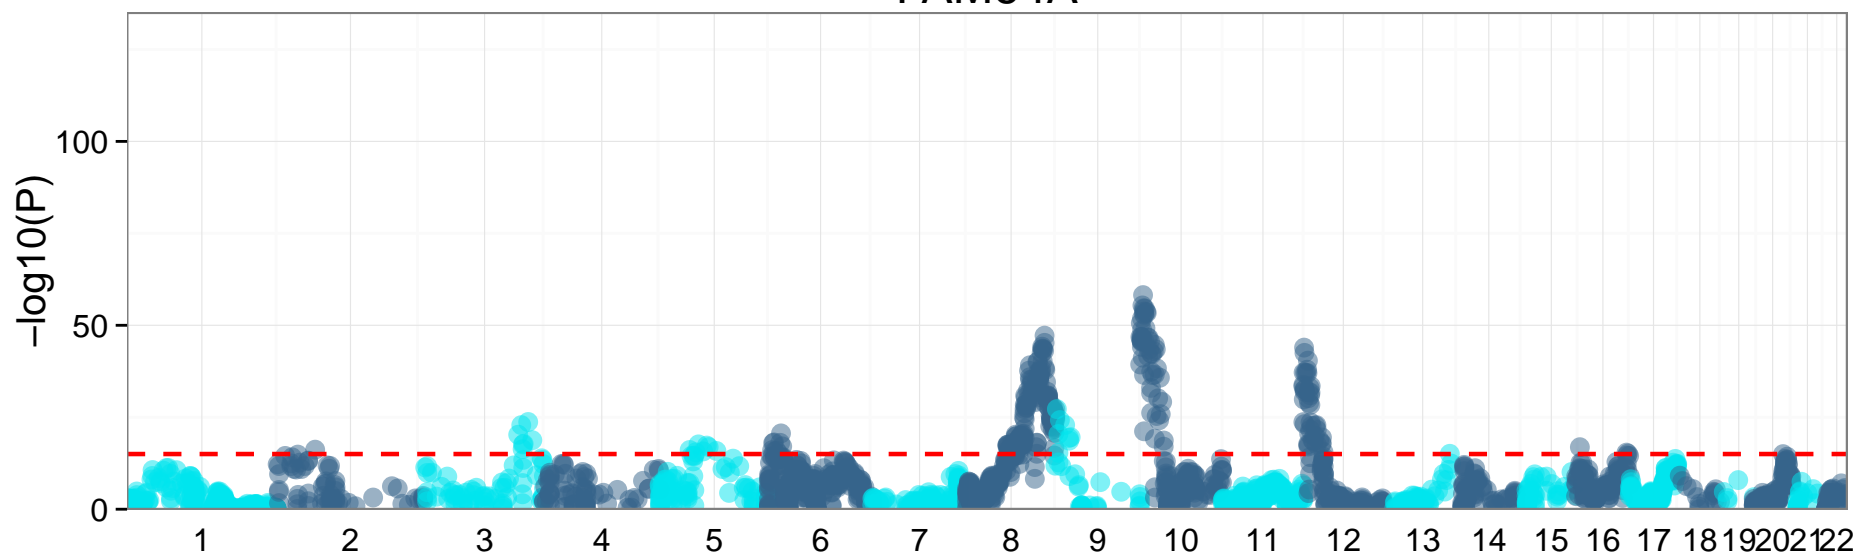

FOXM1

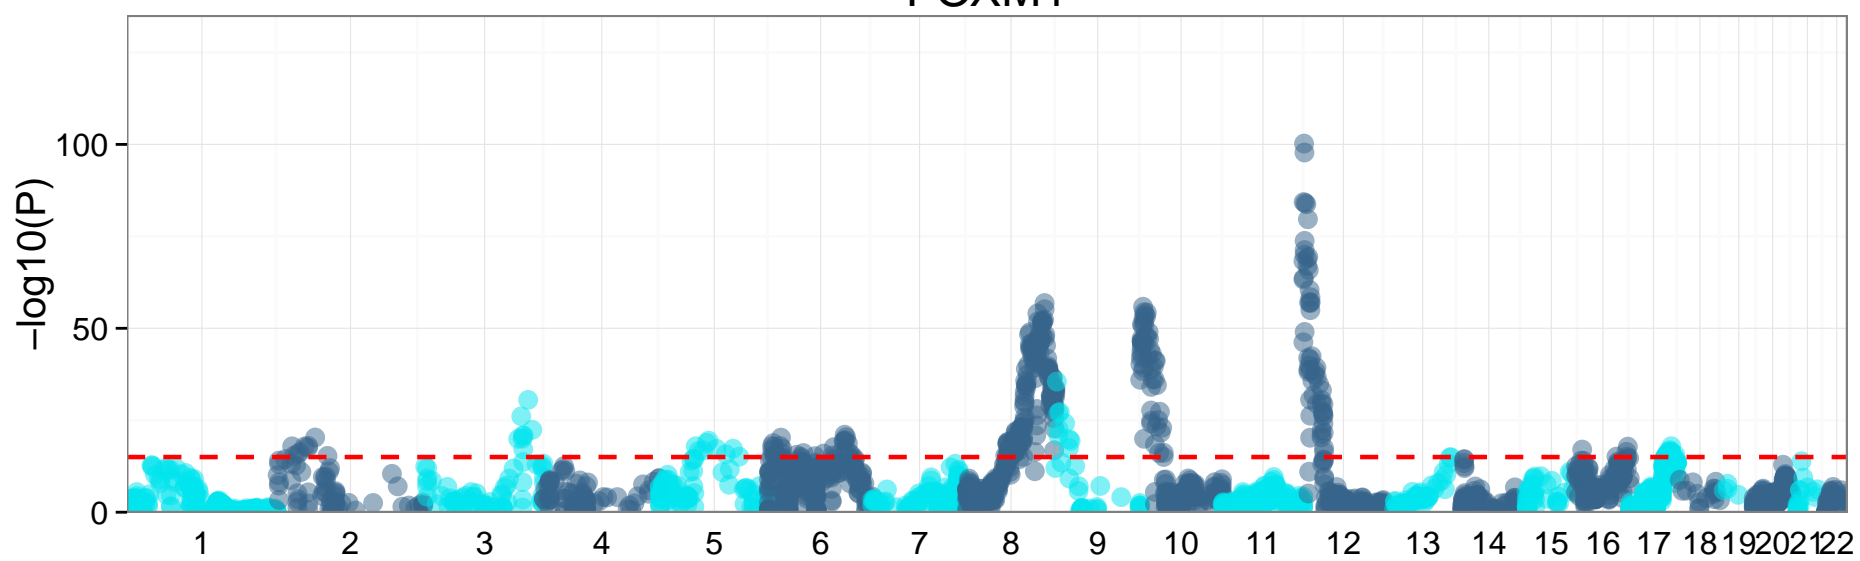

GTSE1

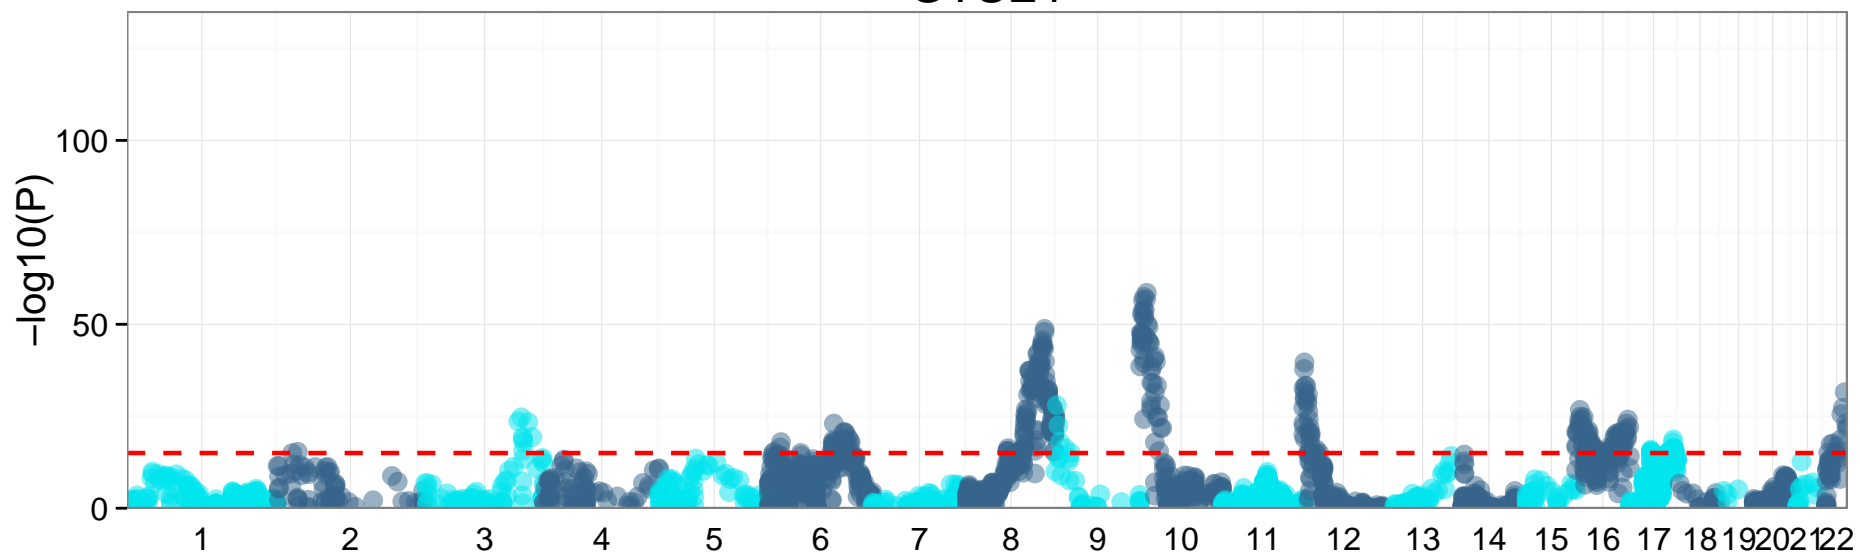

# HJURP

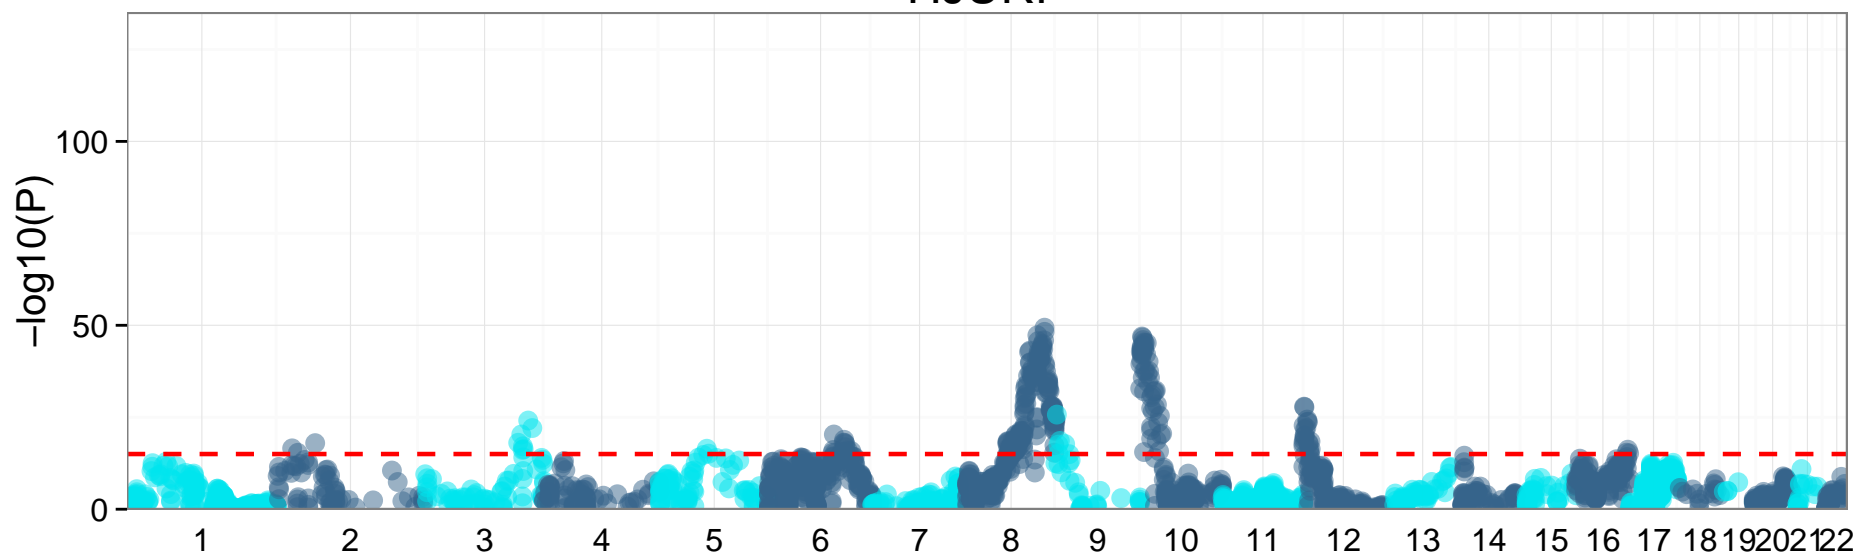

# KIF14

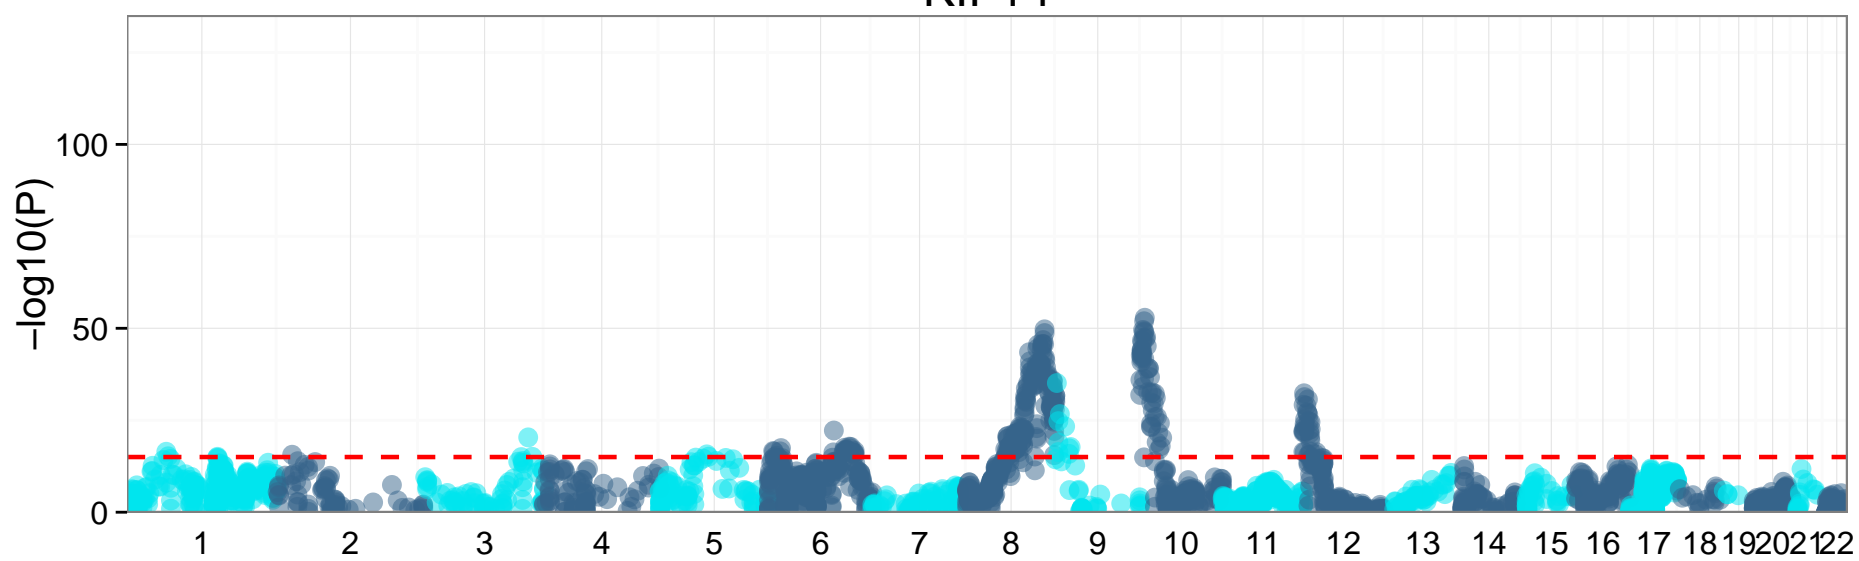

# KIF18B

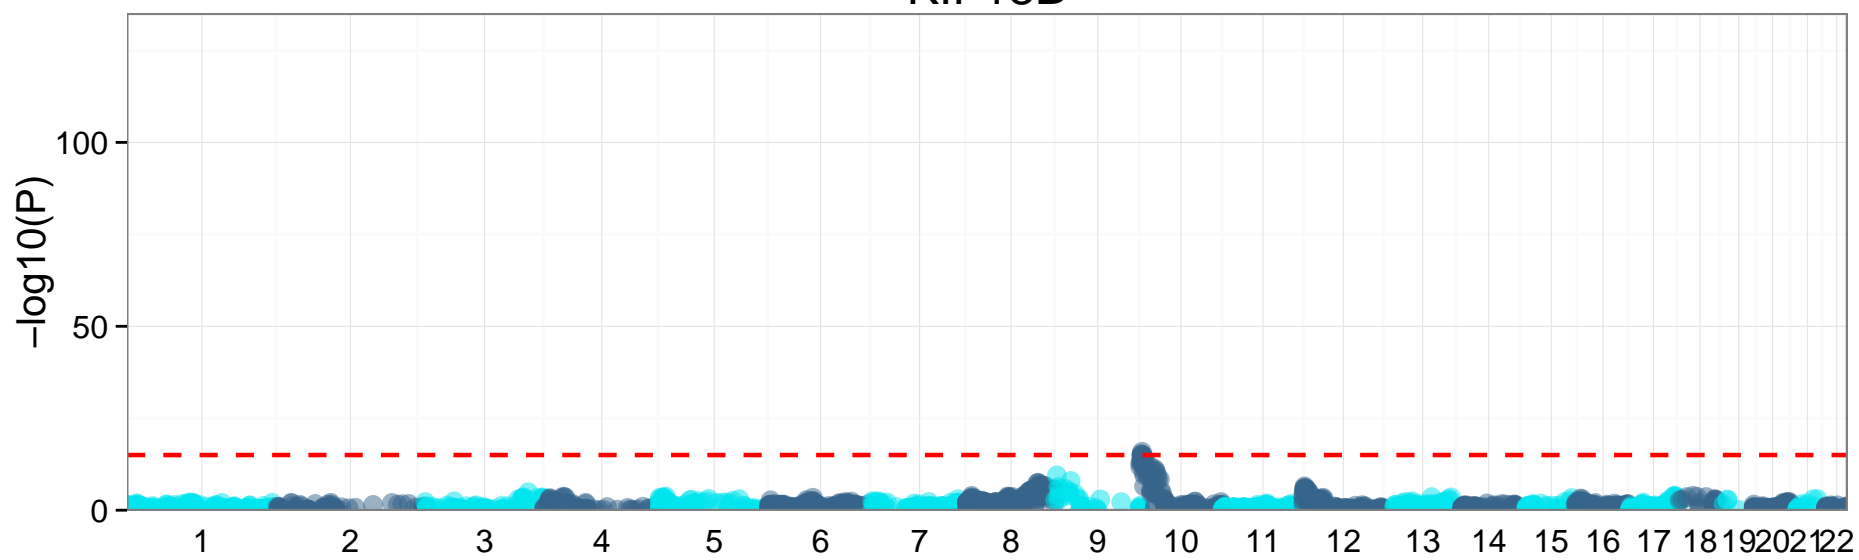

KIF20A

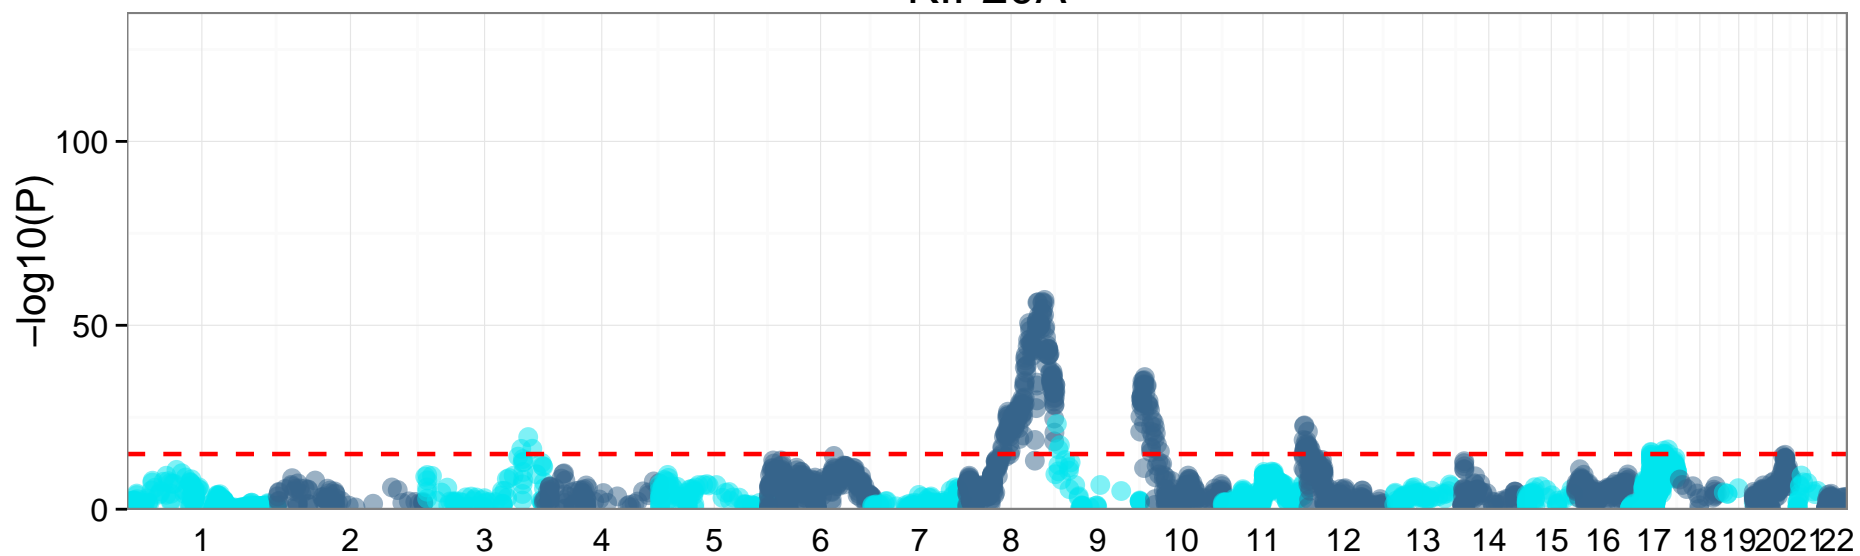

KIF23

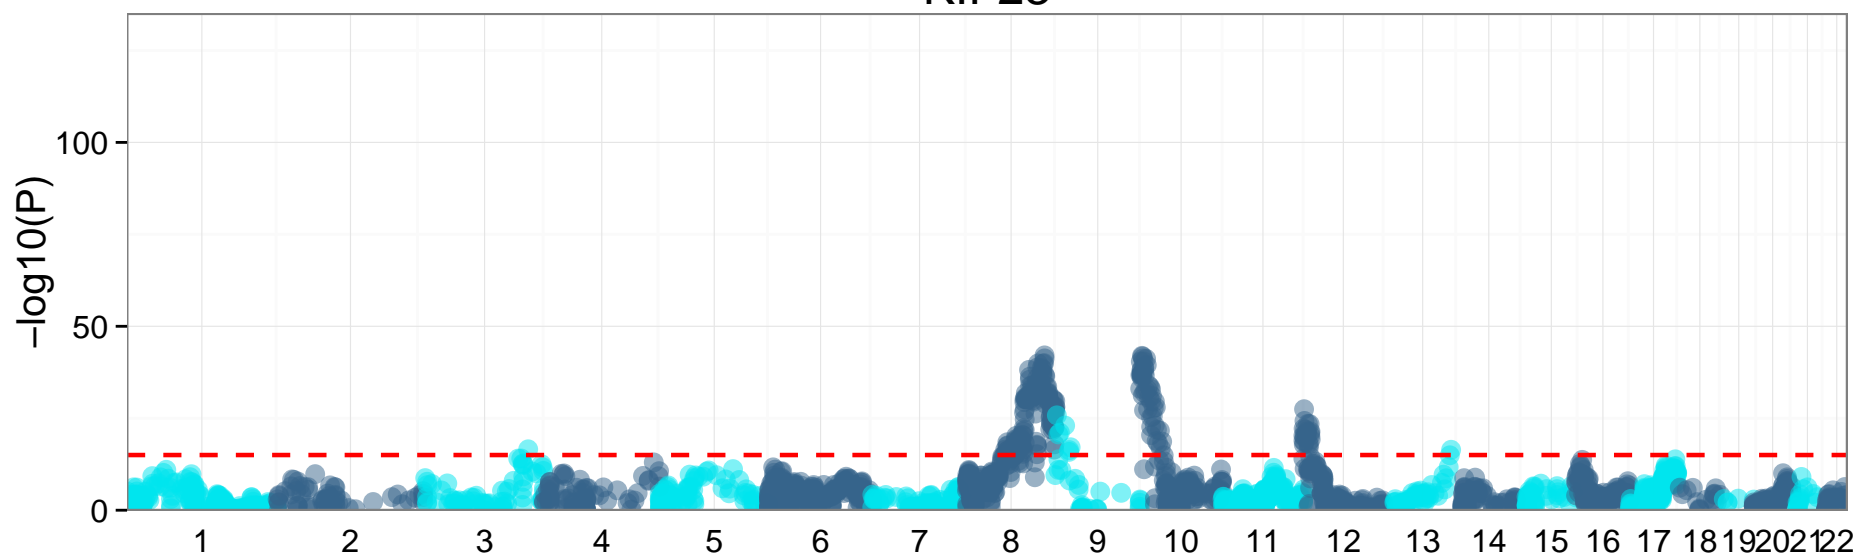

KIF2C

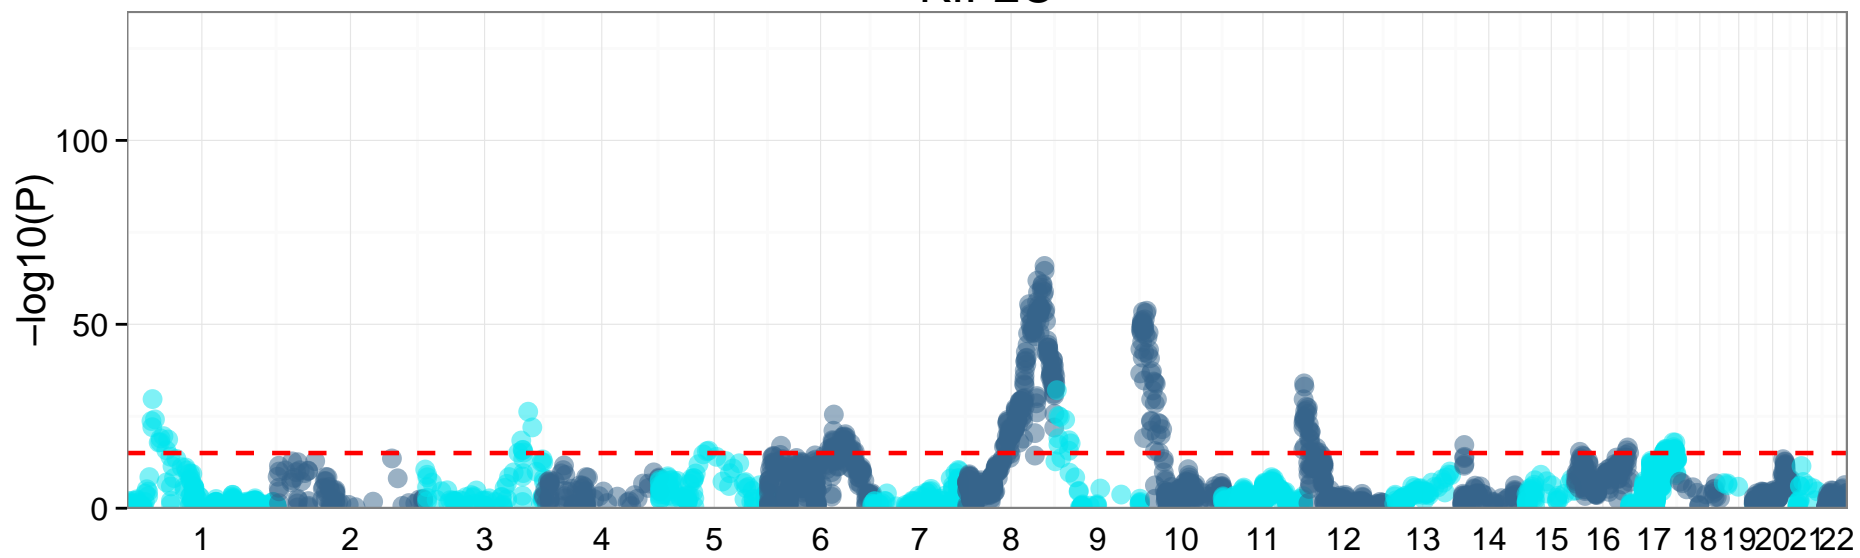

### KIF4A

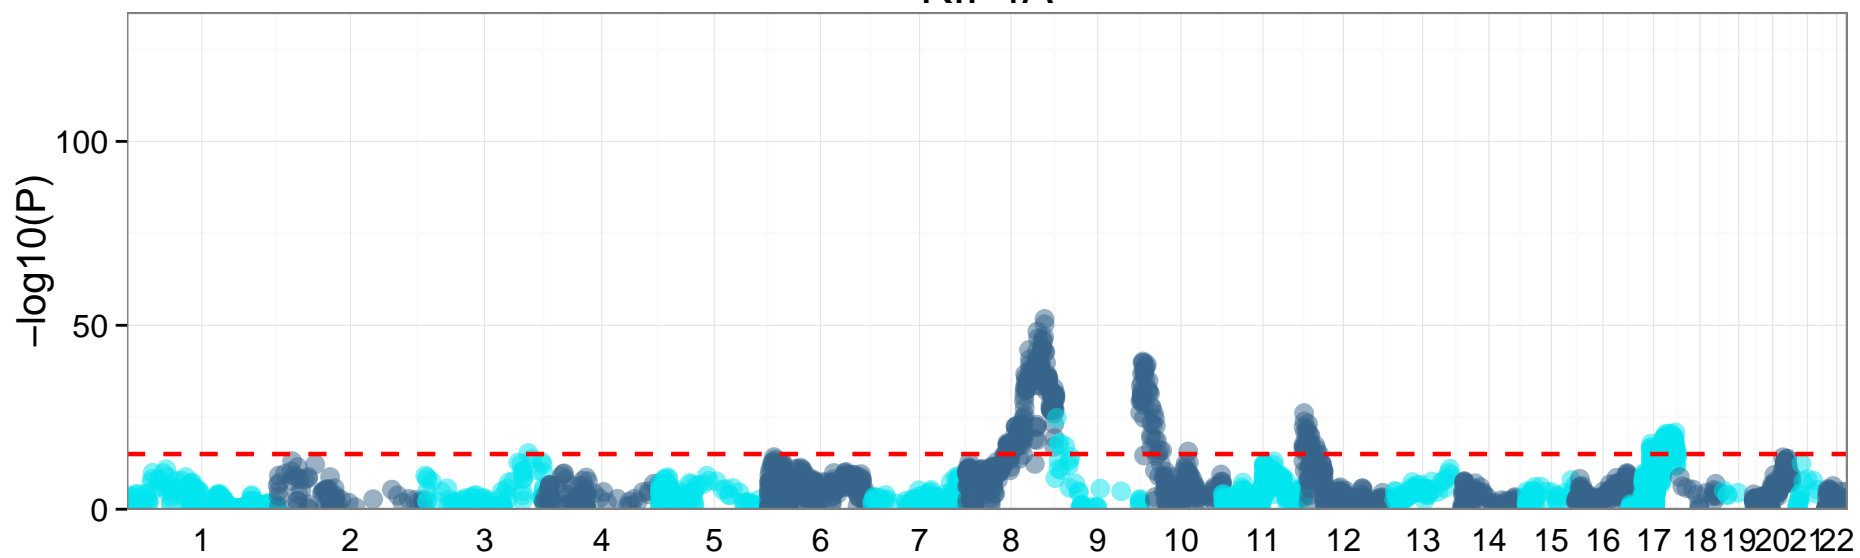

### LMNB2

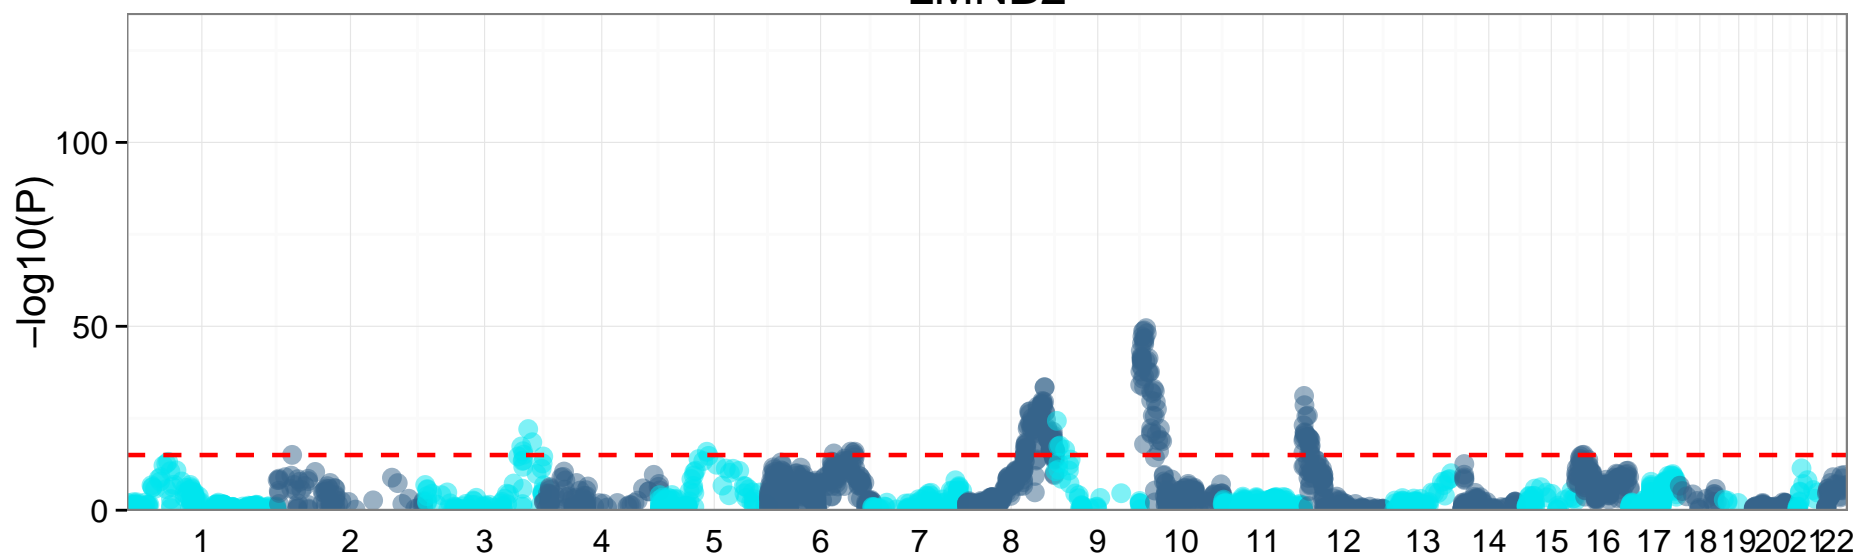

### MAD2L1

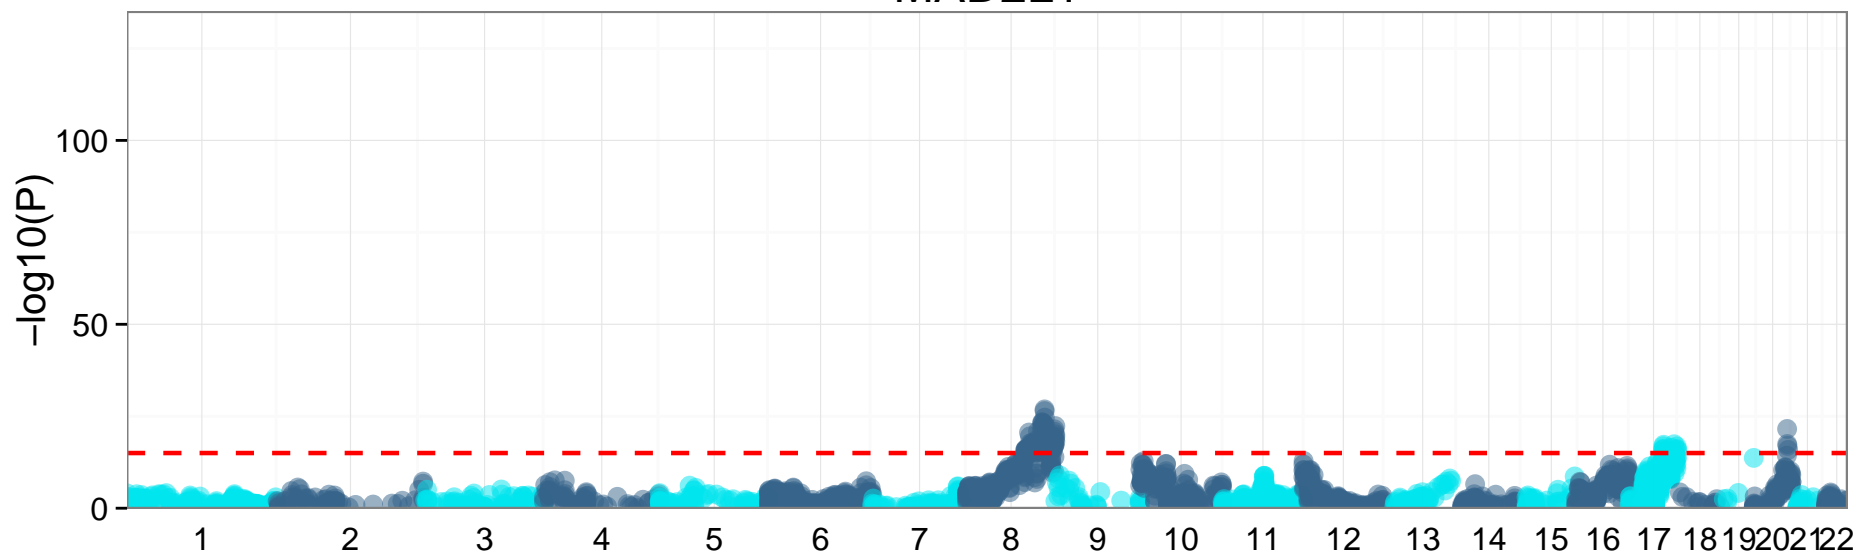

MCM10

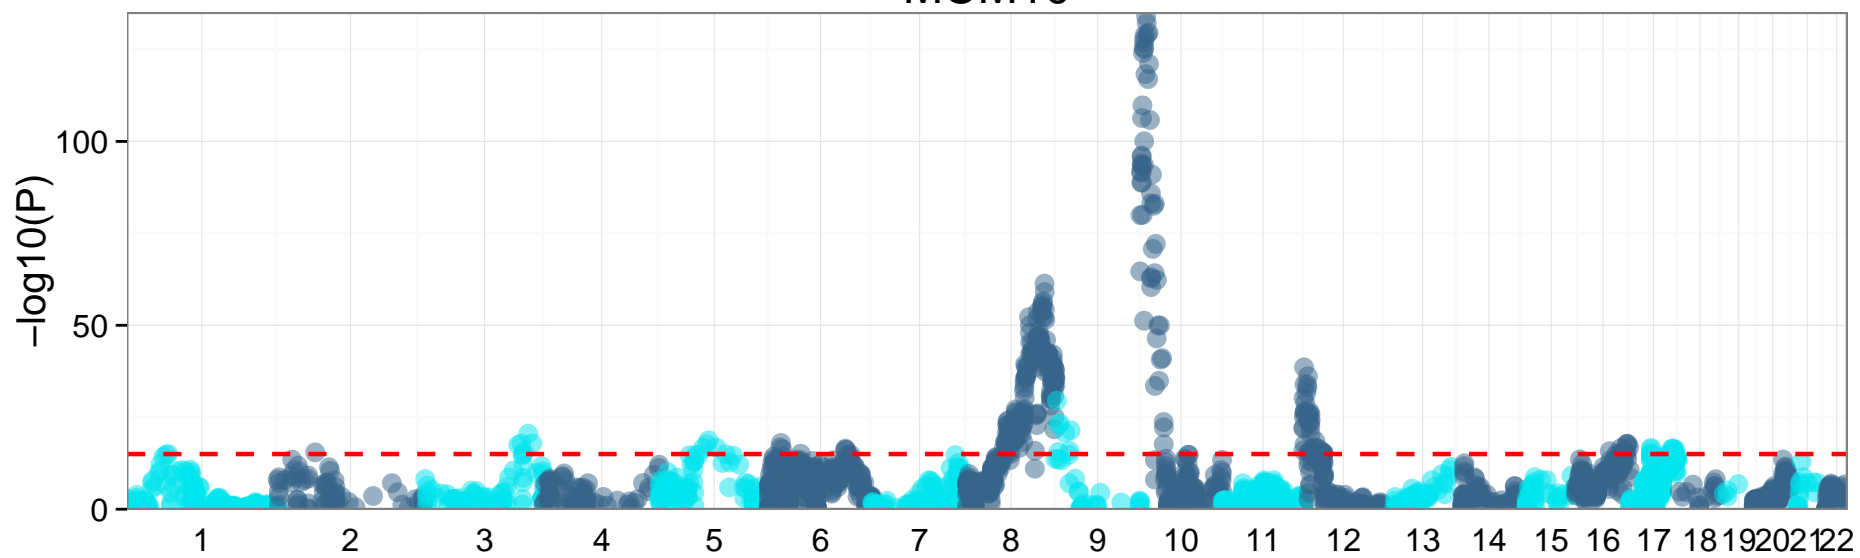

MELK

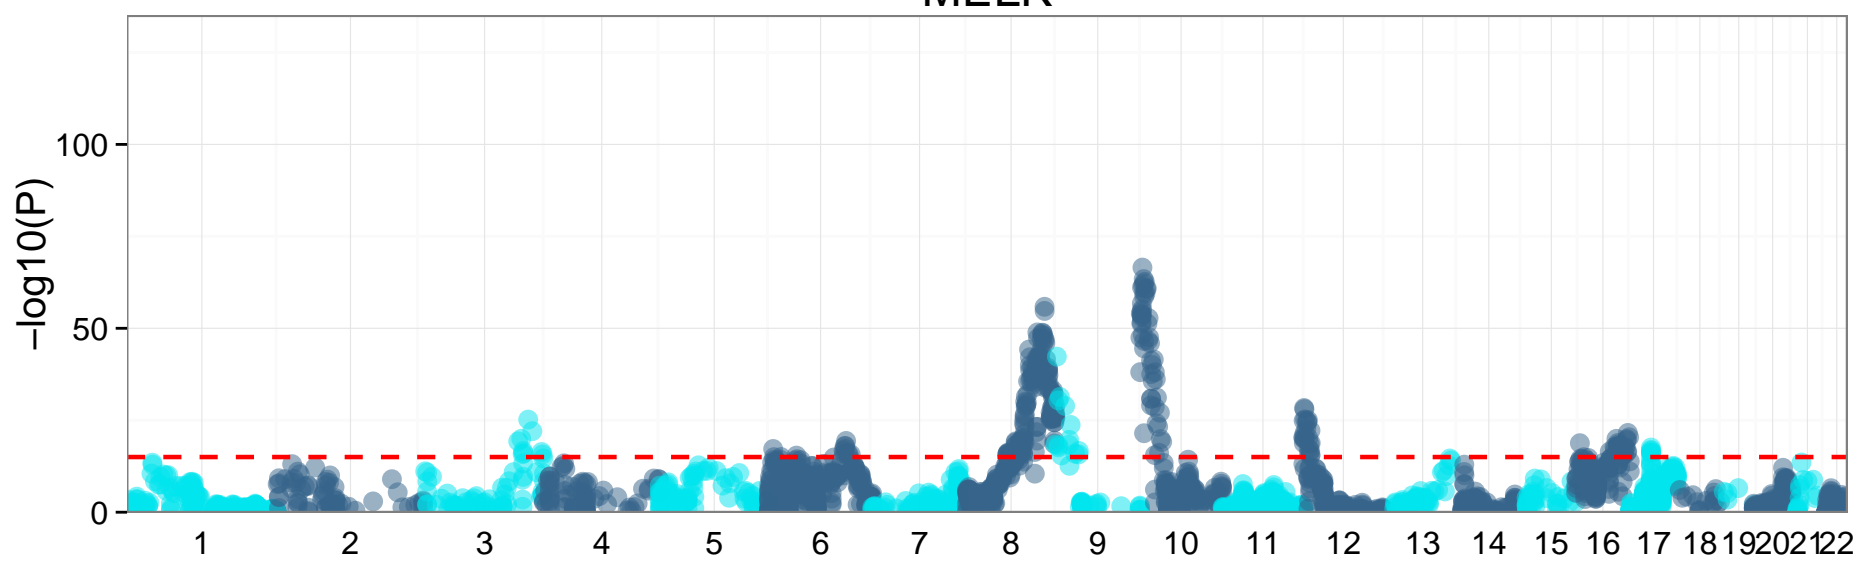

MKI67

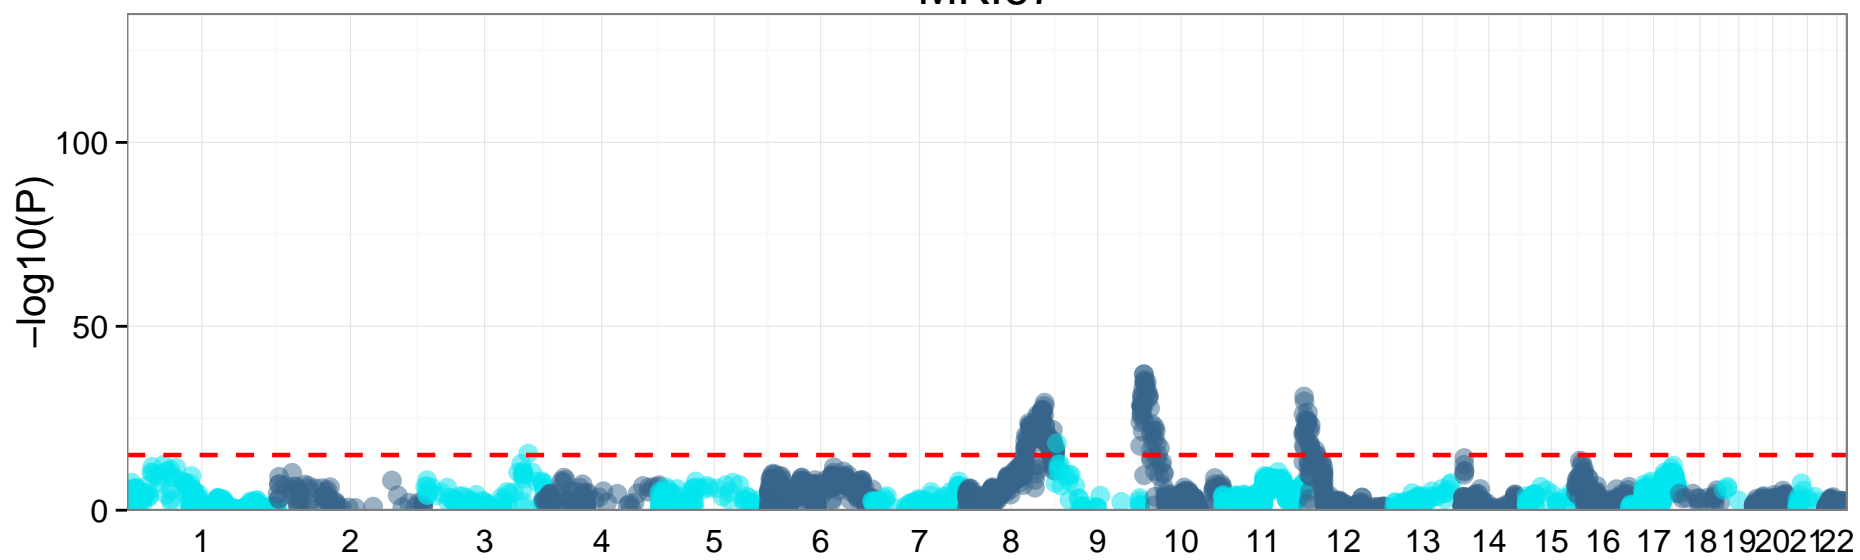



NCAPD2

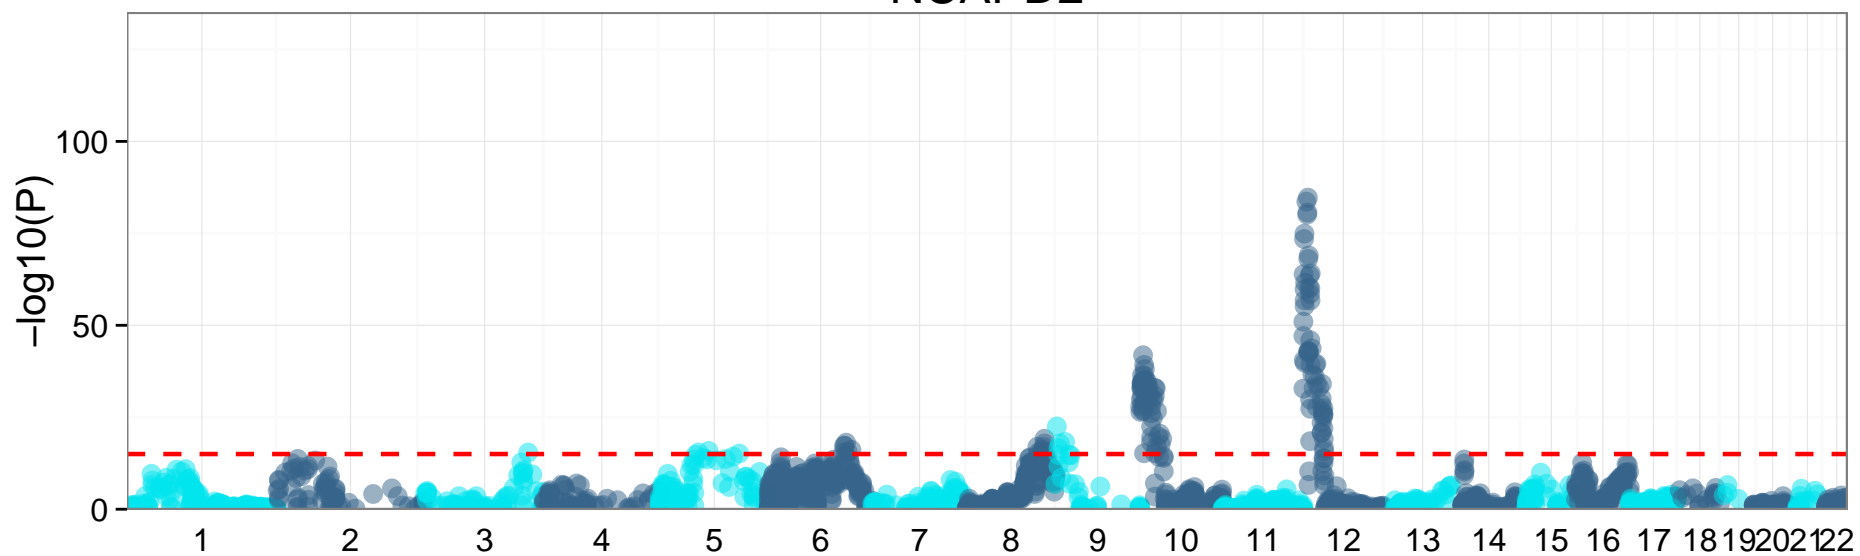

NCAPG

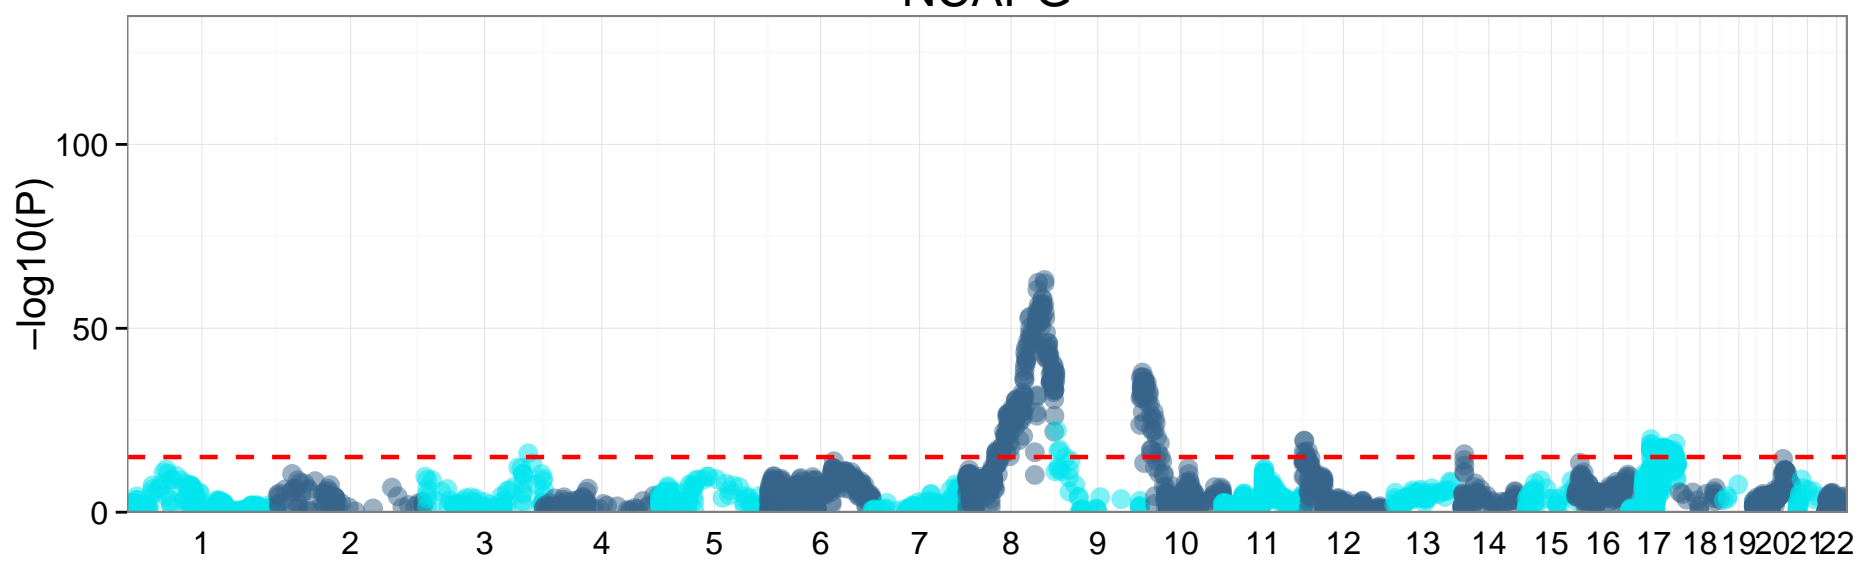

NCAPG2

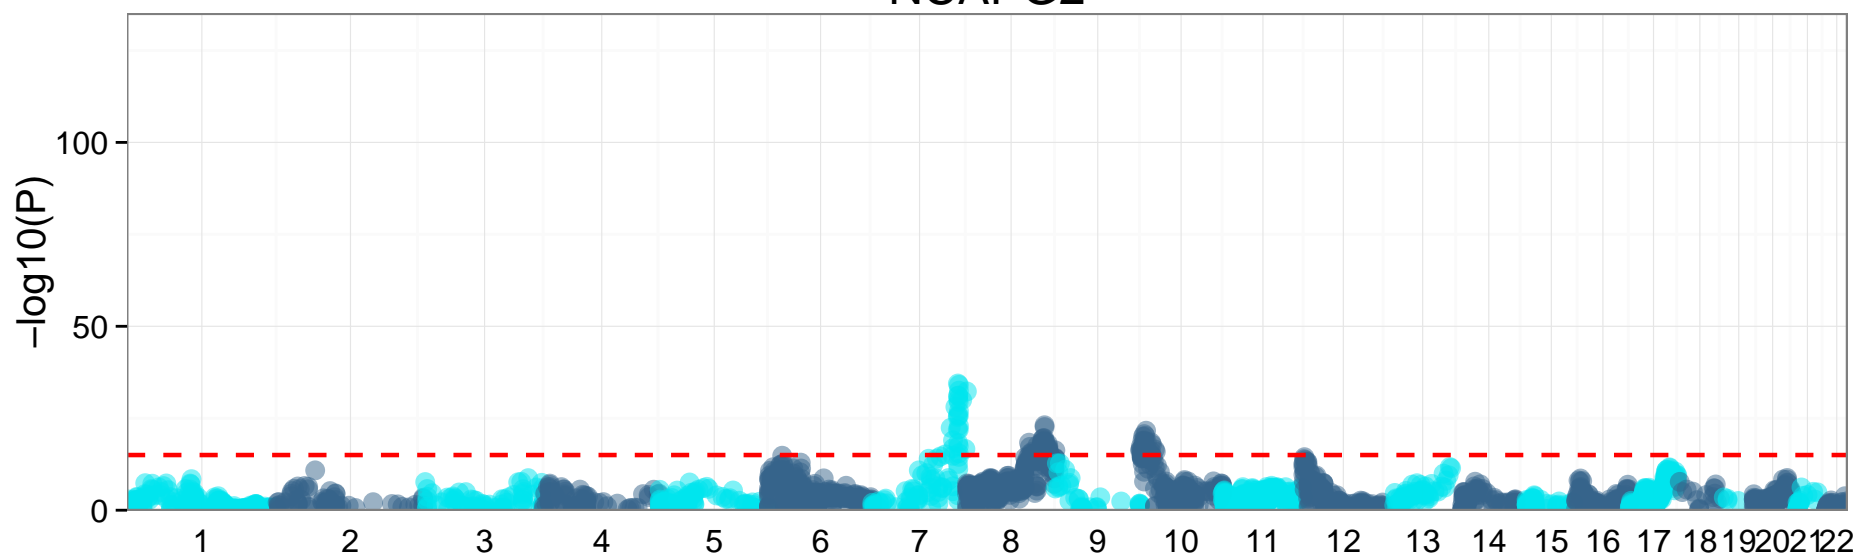

# NCAPH

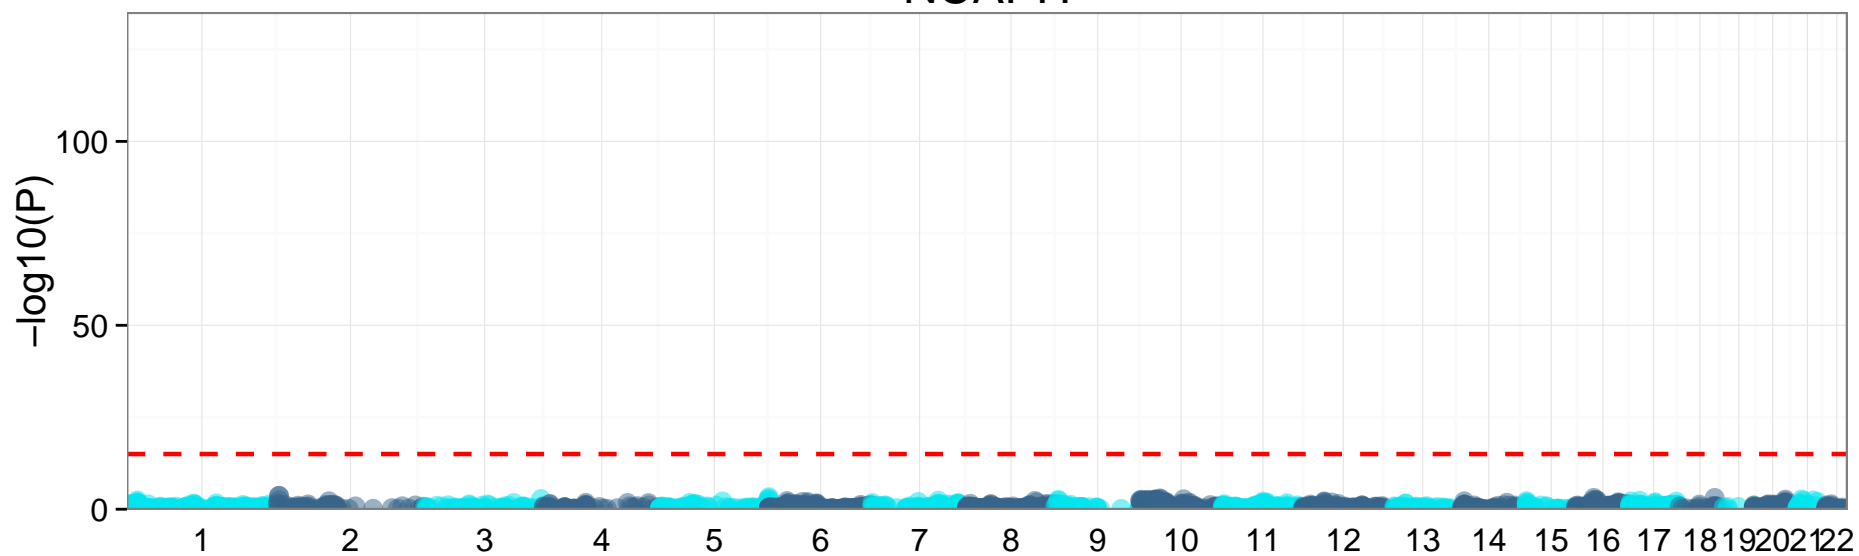

# NDC80

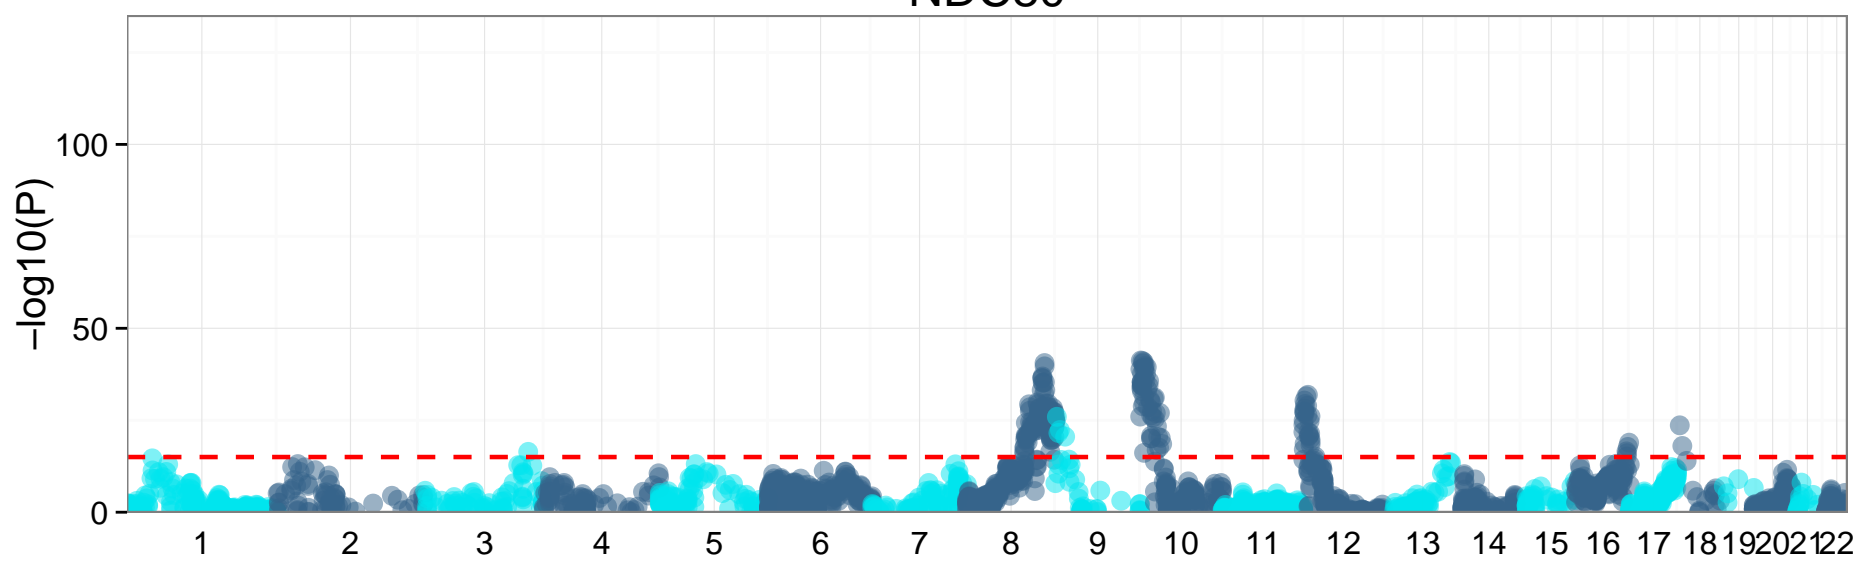

# PBK

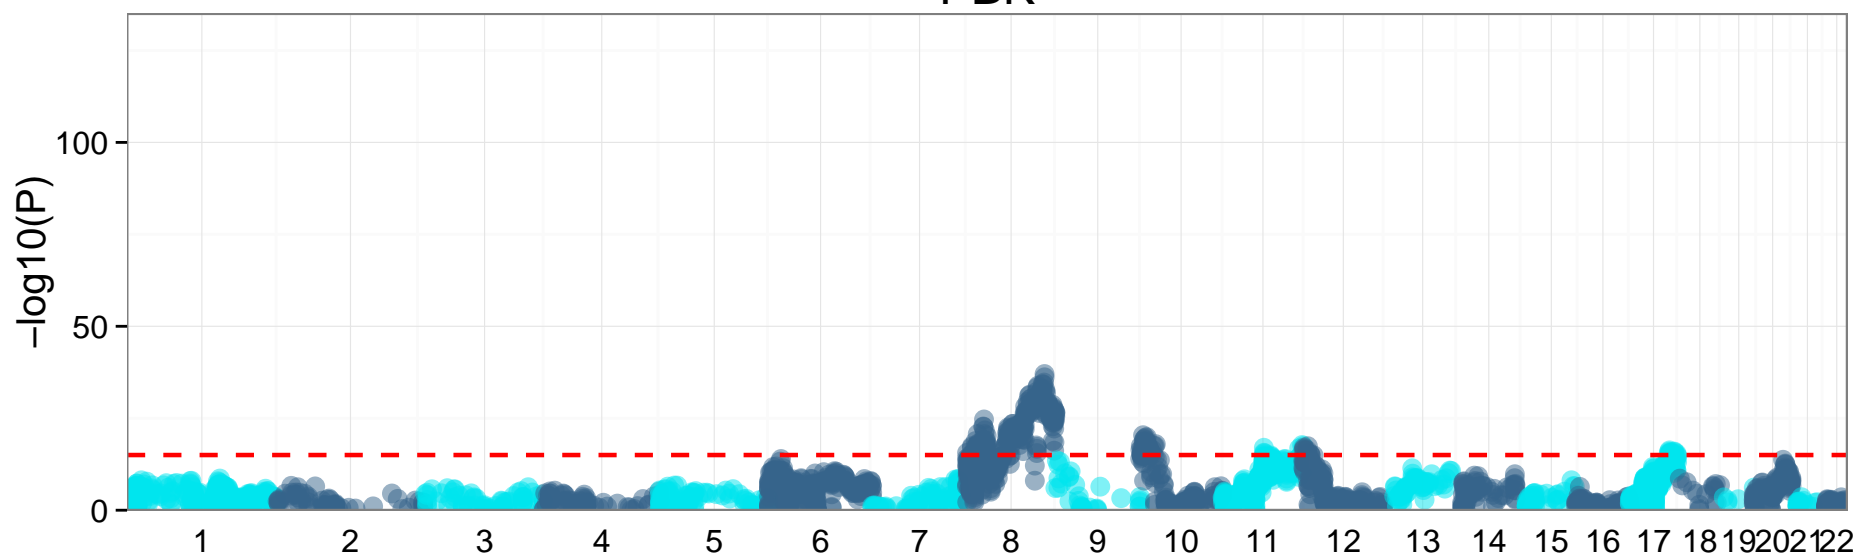

PLK1

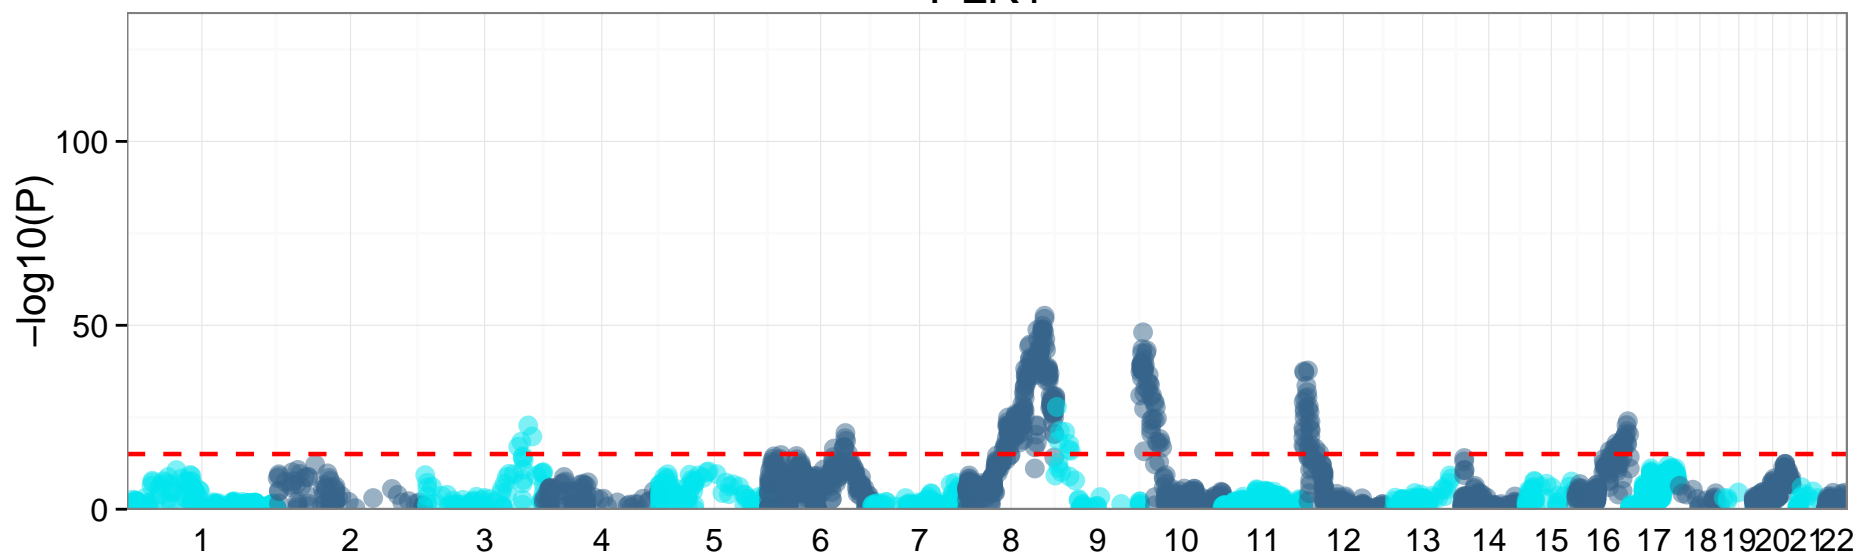

PRC1

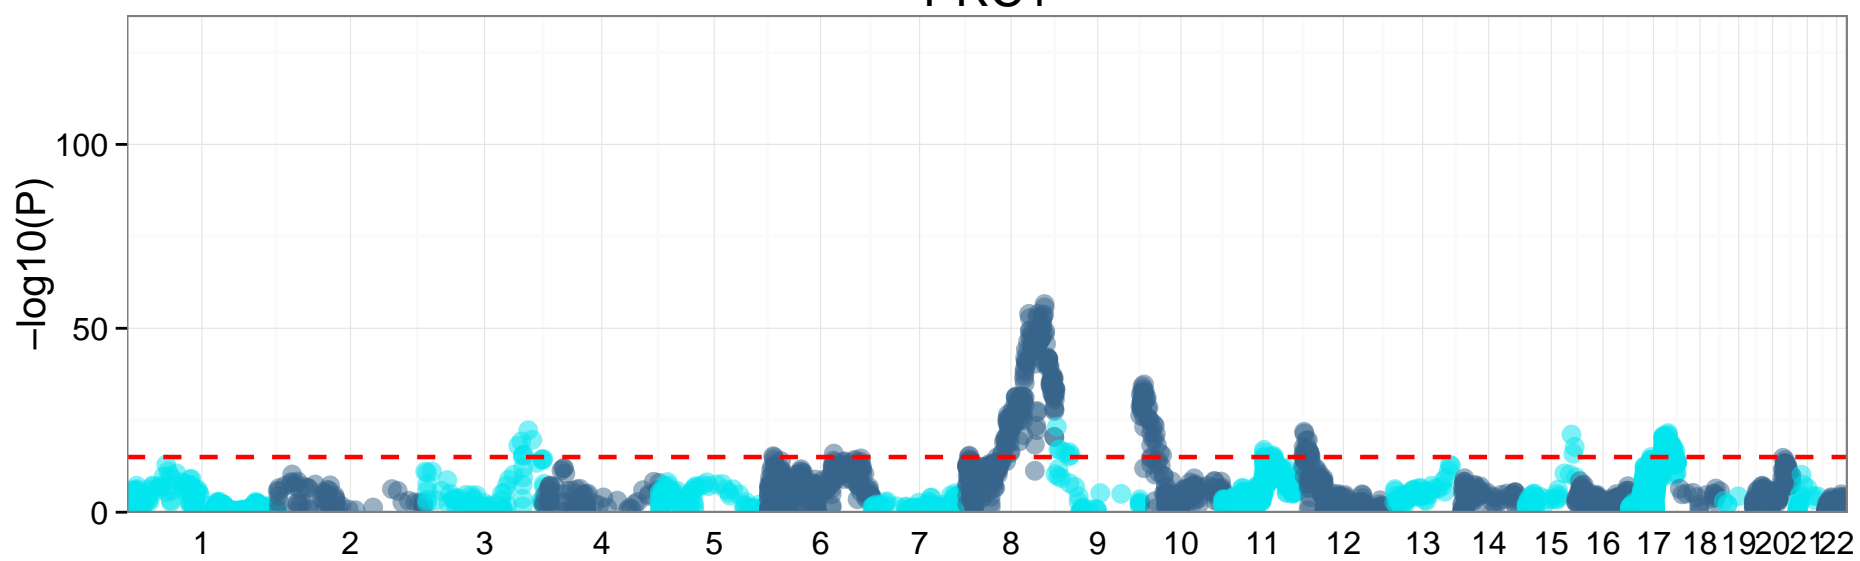

PTTG1

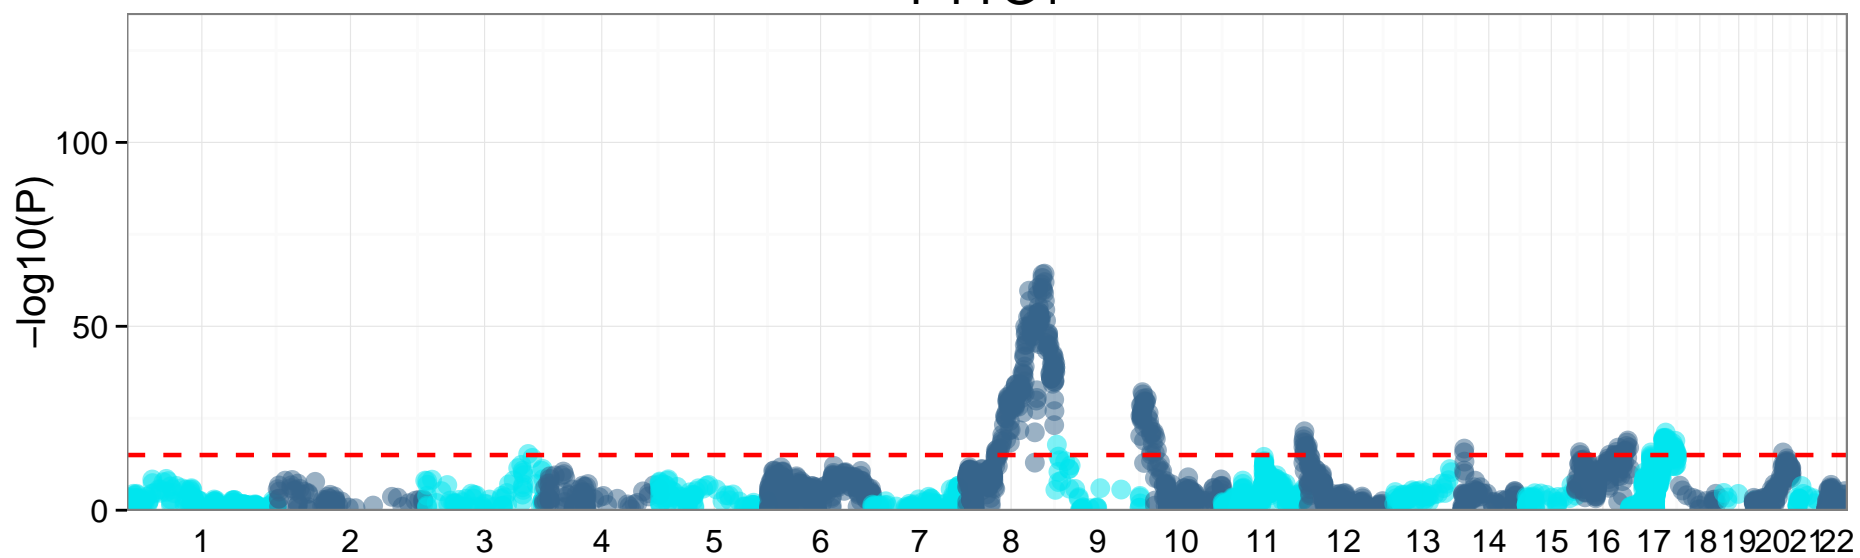

RFC3

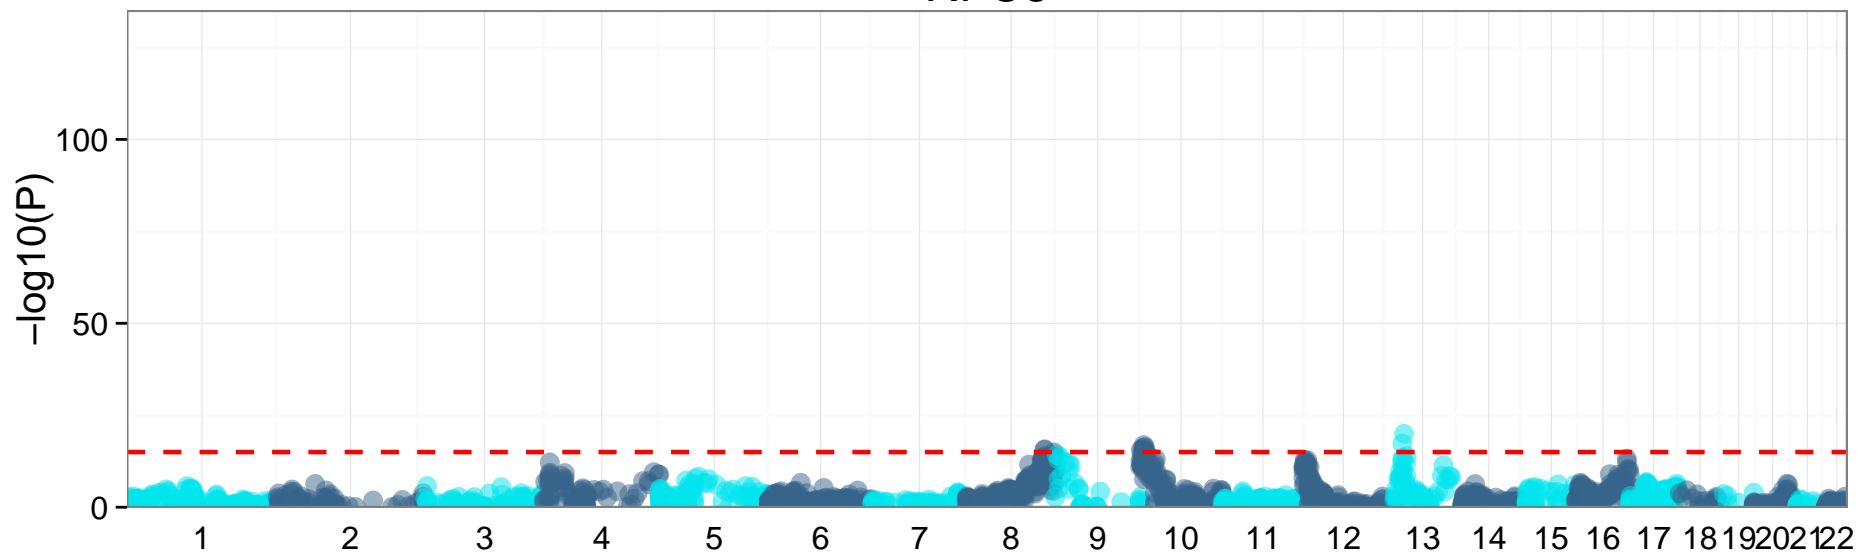

RRM2

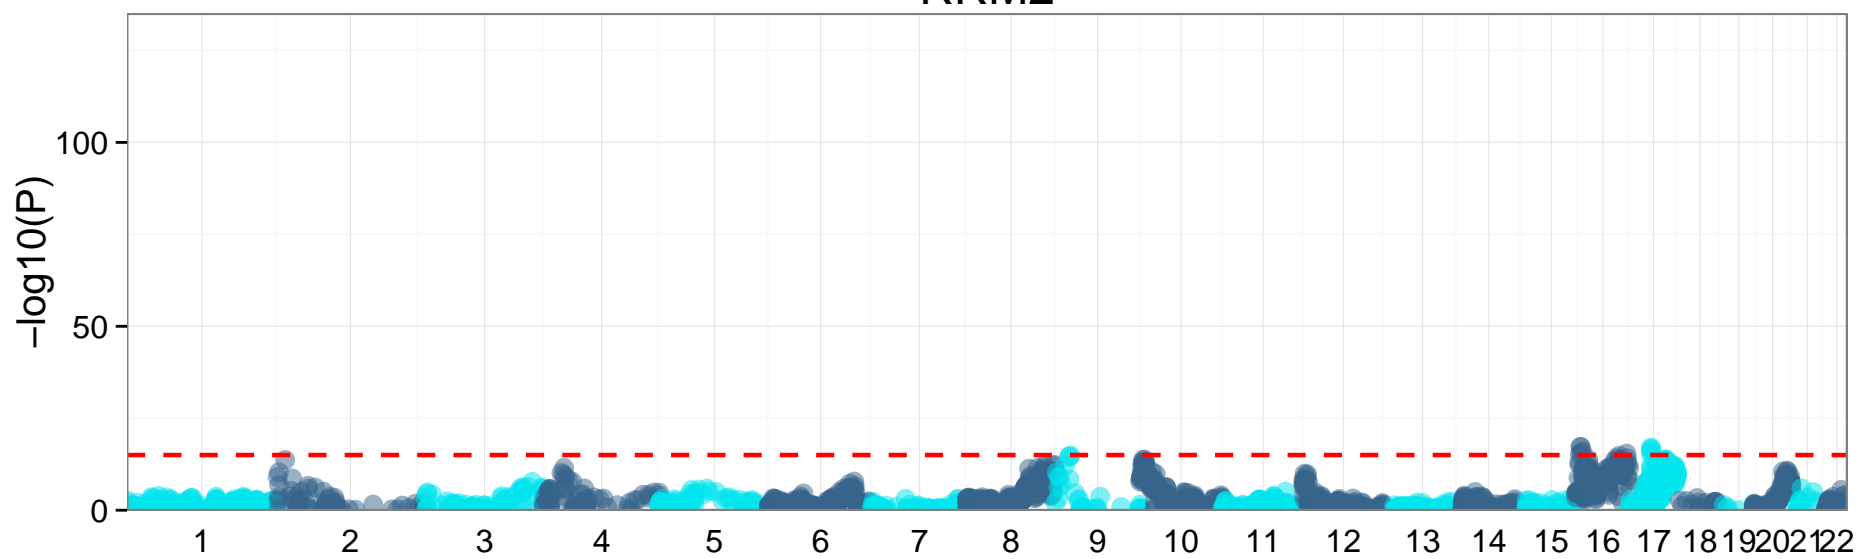

SMC4

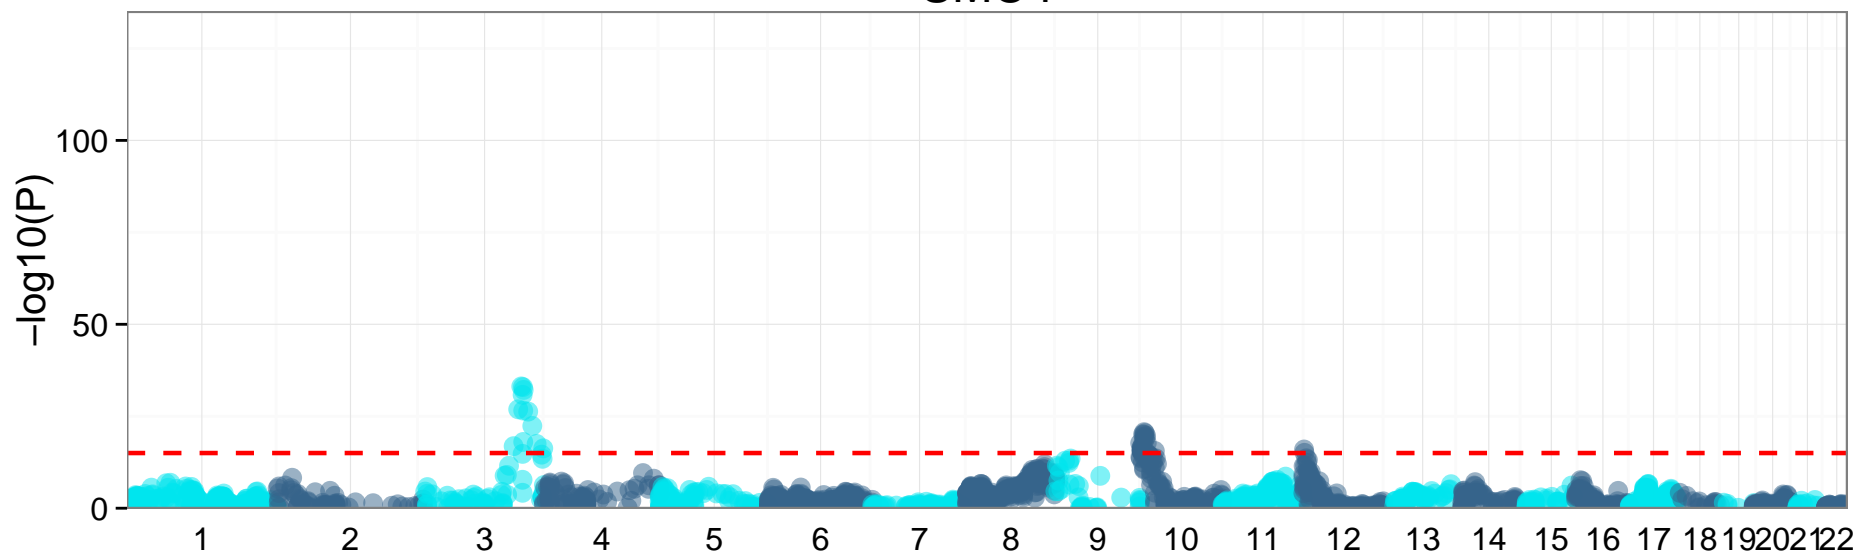

STIL

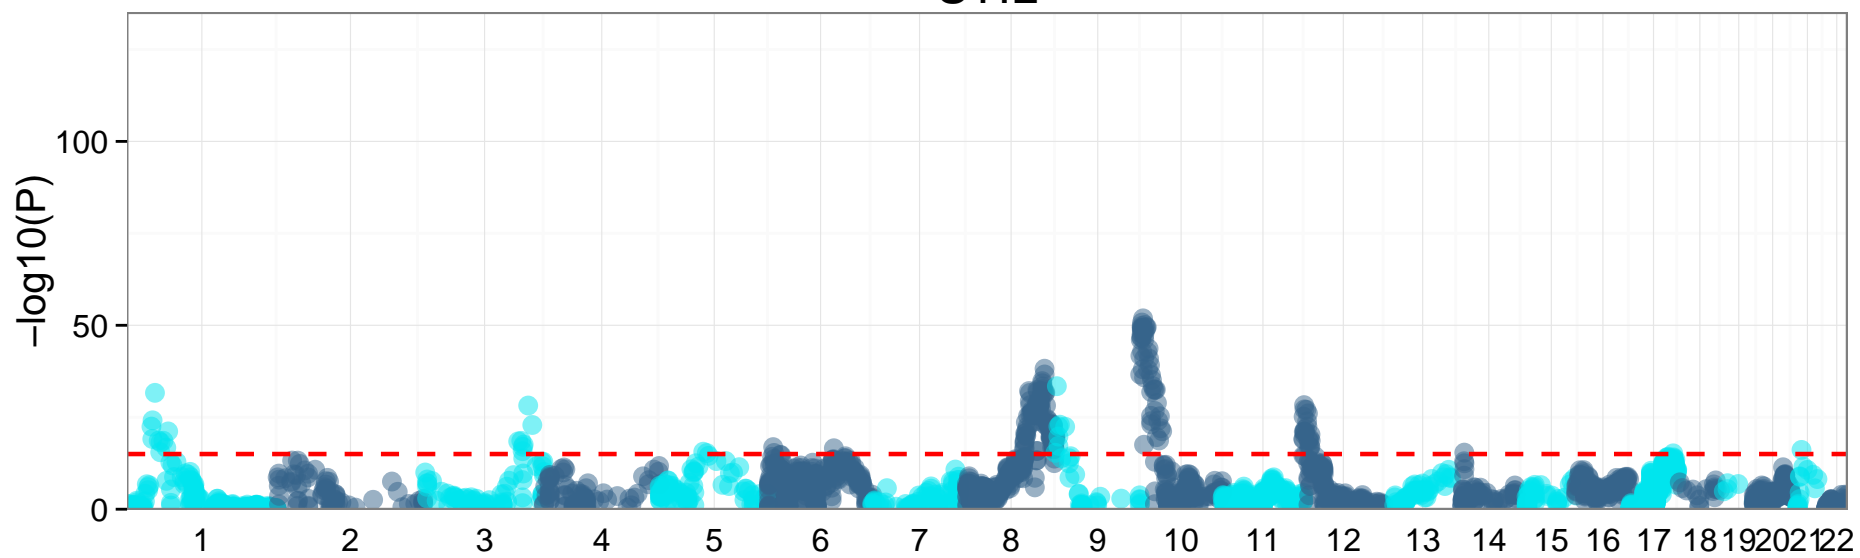

TEX10

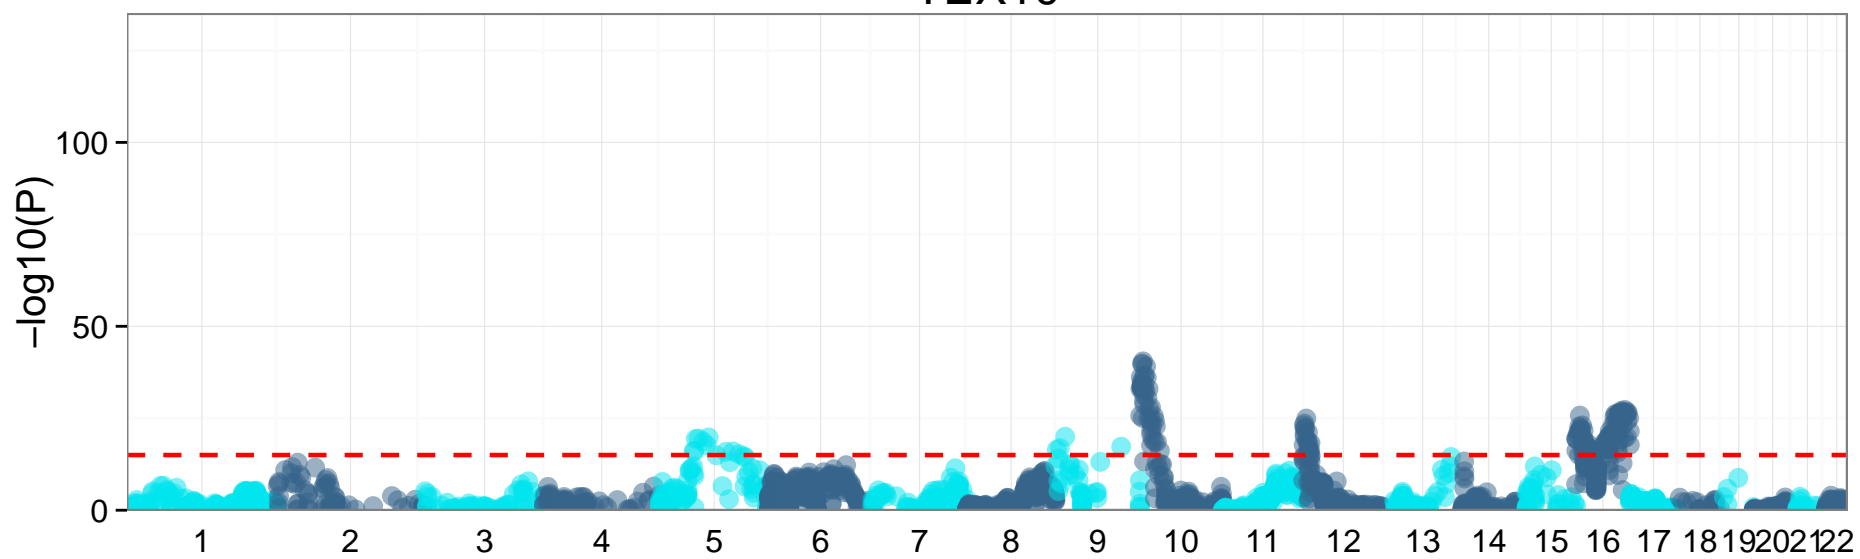

TPX2

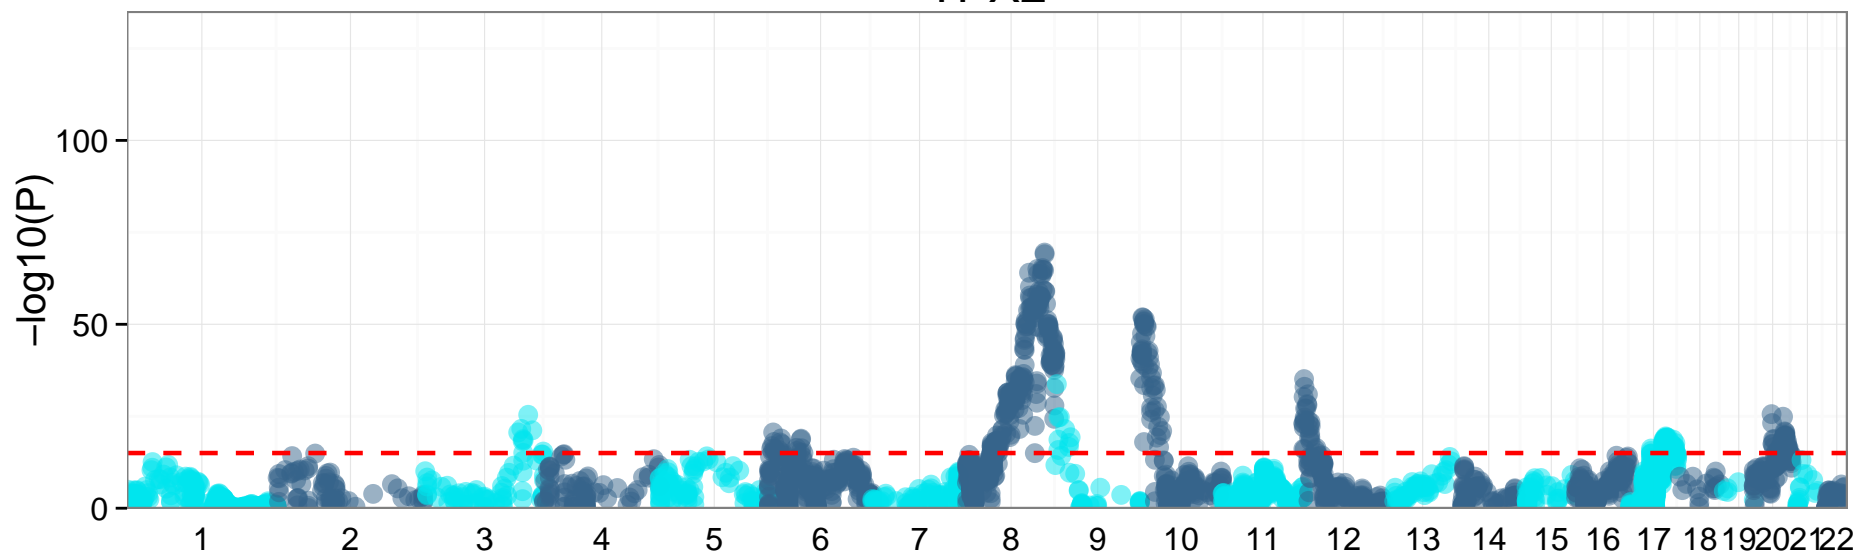

TTK

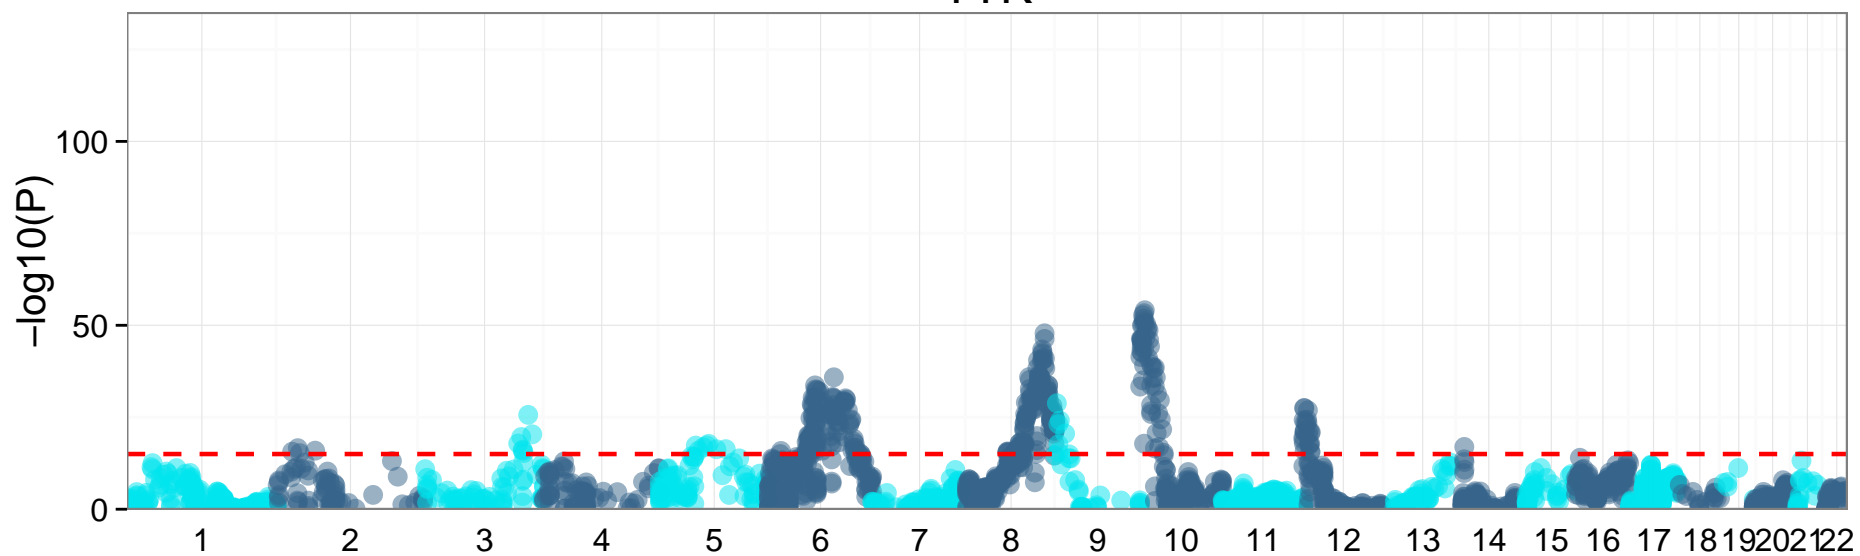

TYMS

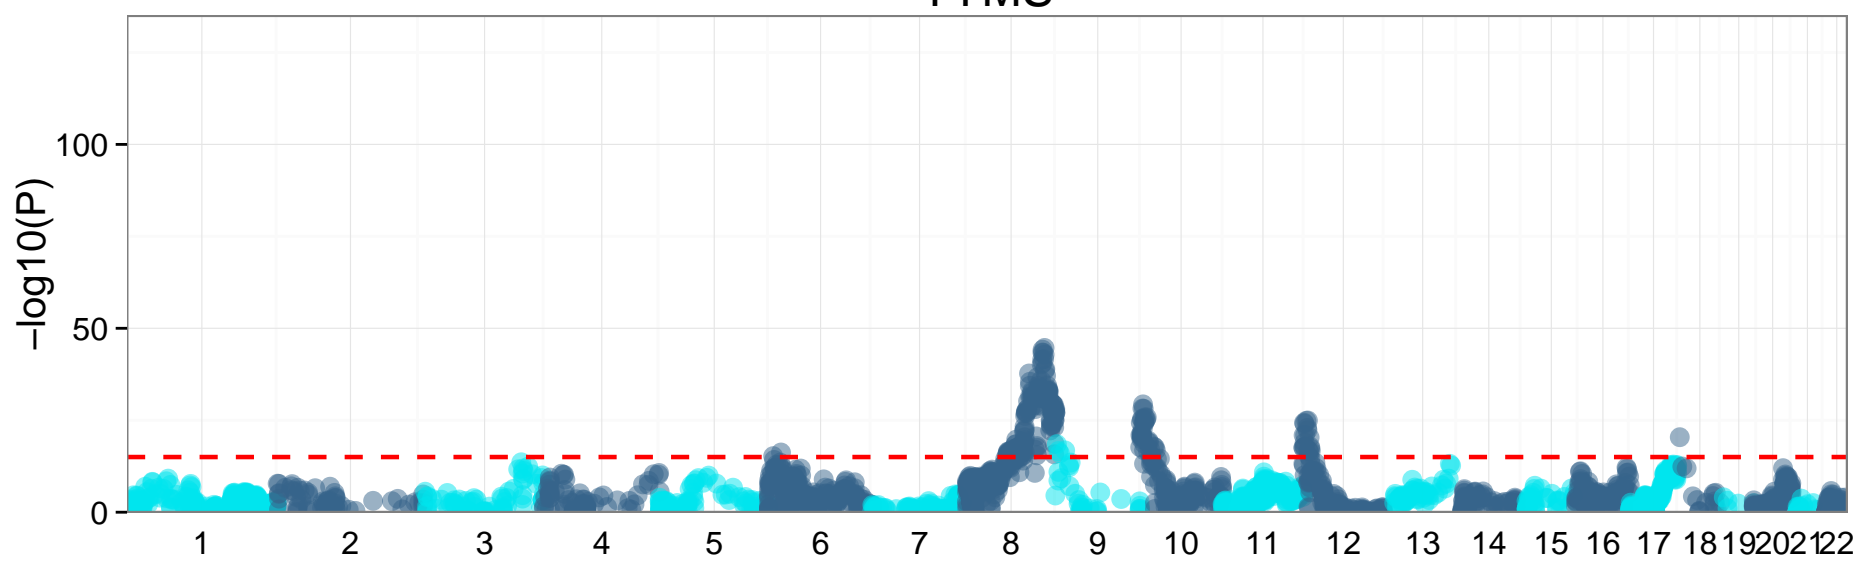

UBE2S

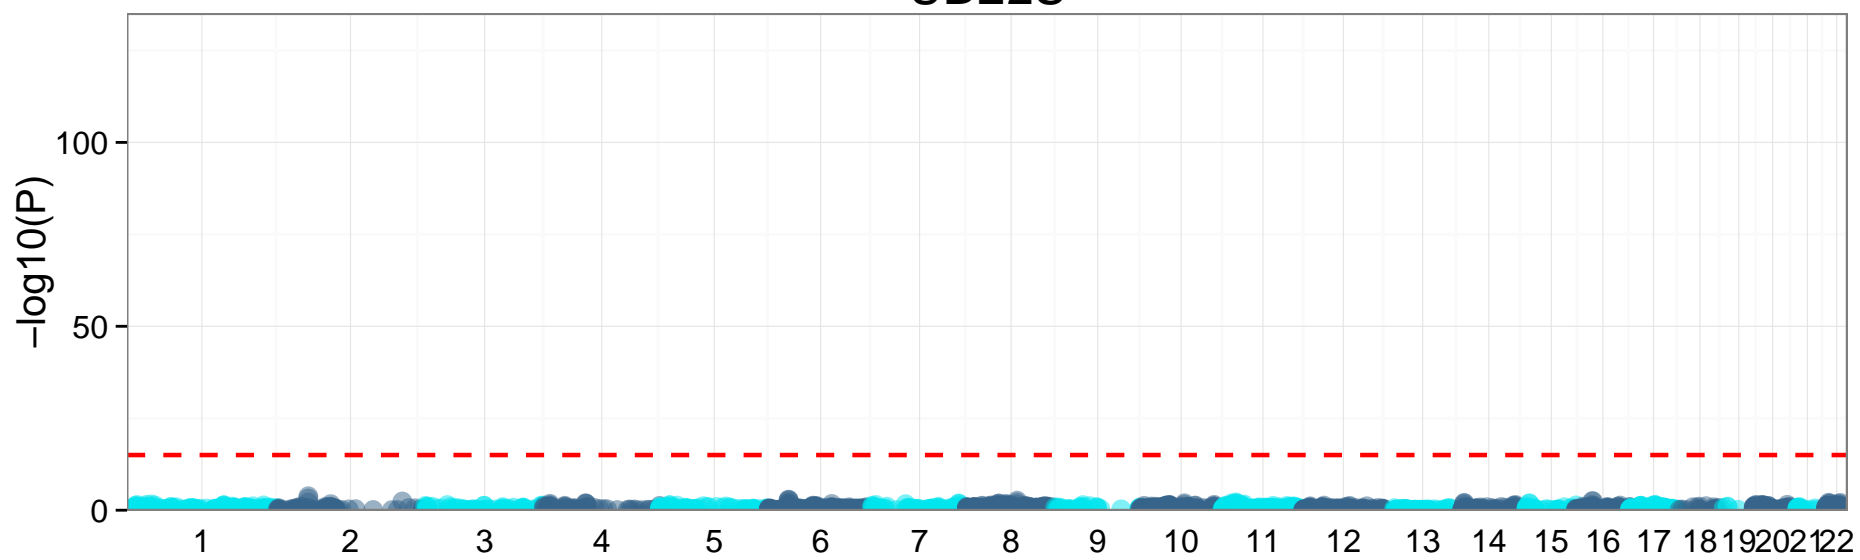

Supplement: MOESM6 [file 10321344]
